# Supplementary material
Source: PubMed Central journal article supplement (PMC2593319)
Supplement: supp_82_24_12205__1.pdf [file supp_82_24_12205__1.pdf]

**Supporting Information Table 1.** The predicted H-2k<sup>b</sup>-restricted octameric epitopes and H-2D<sup>b</sup>-restricted nonameric epitopes, derived from 81 MHV68 open reading frames, are highlighted in gray. The N-terminal residue of each individual epitope is highlighted in black to enable the discrimination of overlapping sequences. Epitopes identified to give an CD8<sup>+</sup> T cells response in B6 mice are highlighted in red.

| Locus Tag | Protein ID | Sequence and predicted epitopes                                                                                                                                                                                                                                                                                                                                                                                                                                                                                                                                                                                                                                                                                                                                                                                                                                                                                                                                                                                                                                                                                                                                                                                                                                                                                                                                                              |
|-----------|------------|----------------------------------------------------------------------------------------------------------------------------------------------------------------------------------------------------------------------------------------------------------------------------------------------------------------------------------------------------------------------------------------------------------------------------------------------------------------------------------------------------------------------------------------------------------------------------------------------------------------------------------------------------------------------------------------------------------------------------------------------------------------------------------------------------------------------------------------------------------------------------------------------------------------------------------------------------------------------------------------------------------------------------------------------------------------------------------------------------------------------------------------------------------------------------------------------------------------------------------------------------------------------------------------------------------------------------------------------------------------------------------------------|
| MuHV4gp01 | 44841      | <b>M</b> QLATLCLLSCILGQSIHWPSVNIETYPPEDDTKEDMRDYLFVLVQNCLLDQNFNATYCSDSFEKLDKRSHTFLPDTCNVKTFFLVNYNRHKYGIKFKFESRLPLPTMASATSGRVIKVLVLAEAGRPWKRHWANL <b>A</b> MVTYSNVVRLTDFNAKFRTRFSRIWVSVTLDRHEVDLDTFAGFLFAAPESVQLTLLMDYVPTFTWCGQISLNDPDLVPVPSF <b>Q</b> AIRIL <b>P</b> V <b>M</b> CFPMWRYLNGQDFHHQDQGCHQESKWWNPTHIIPRLNPGTESHNITLNTCVCHVKYNDLQELDTAHRIKILTISNFFGFYKPLYLVVTFYFGSSDVNVEGQAPPLQYCVVFIHRGQYGFFRTRQRGDPDCPCHFSLGRDEIVLVGHYVDVKRIVGITIFFDGGQEHRSYLGKLSRAAVVGD <sup>22</sup> TTNKIKFNNSS                                                                                                                                                                                                                                                                                                                                                                                                                                                                                                                                                                                                                                                                                                                                                                                                                                                                                              |
| MuHV4gp02 | 44842      | <b>M</b> RFRFQVMAPTPPQGGKIPNPWPGGCSQNPVLWGDGTDGNYRPSWPILGQVPCDQRFPHPSGNKNSSSTSGGRPQRPLPRTRFPKTIIRGFNKLRLSTLKSPPWKPSPVSPPEEVPNAGSPEENIYETANSEPVYIQPISTRSLMMLDSGSTDSDPENLGPTRPL <b>P</b> KLPNQHPMNPEIRLPIIPSPKCHKGFVEWGEE                                                                                                                                                                                                                                                                                                                                                                                                                                                                                                                                                                                                                                                                                                                                                                                                                                                                                                                                                                                                                                                                                                                                                                      |
| MuHV4gp03 | 44843      | MAFLSTSVLIKCCILLAGGLAESLTLGLAPALSTHSSGVSTQSVDLISQIKRGDEIQACHLTPAETEVTECAGILKDVLSKNLHELQGLCNVKNKMGVWVSVVEELGQEITGRLPFPSPVGGTPVNDLVRVLVAESNTPEETPEEEFYAYVE LQTELYTFGLSDDNVVFTSDYMTVWMIDIPKSYVDVGMLTRATFLEQWPGAKVTVMIPYSSTFTWCGELGAISEE SAPQPSLSARSVPCKNSARYSTSKFCEVDGCTAETGMEKMSLLTPFGGPPQQAAMNTCPCYYKYSVSPPLPAMDHLIADLAGLDSLTPVYVMAAYFDSTHENVPRPSSKLYHCALQMTSHDGVWTSTSEQCPIRLVEGQSQNVLQVRVAPTSMPNLVGVSLMLEGQQYRLEYFGDH                                                                                                                                                                                                                                                                                                                                                                                                                                                                                                                                                                                                                                                                                                                                                                                                                                                                                                                                                                        |
| MuHV4gp04 | 44844      | MVGTQPRFLVKIHQKQFYWAIRD <sup>22</sup> LIHGGYKR <b>S</b> GLTSS <b>F</b> ALVAMGPLGRPWA <b>A</b> SFGFFFLAVVSLATPTPGEDDDI PVKIHRLTFVKGLVPDVTGGSSYYVCVYPSRKLCTPTRWKDLSRFLNSETLNQVCSARTIYSVVPVEMLRISLPLPPEIKSIVGGSSIRSQYV <b>S</b> FPFT <b>S</b> LSLHPAKL <b>P</b> LWKS <b>F</b> ANLKVSMKFRSSQWEVAFSVVSKTDYAITYWAIEIPGLIHESAT <b>I</b> NLINQPLLALYADLHVDMMVRLTDKFIYCQTYTLQKQNLDPRTGKRPTSSVLIPSPHVKNQCIRRRNETHFVDTCSSAWDNYTSEAHNISRNSSSRGSNATQLVNITANPCTPLTFLWDNWPCTYNYRSPVPEIVIHENILLEGRAIY <b>I</b> YHQIGLFDQPRLCVATFWMSSKEETLLMQLDYPCEVSEVKKGKFFIKSVSMYHAISMVTFIWEYGEIYDFLE                                                                                                                                                                                                                                                                                                                                                                                                                                                                                                                                                                                                                                                                                                                                                                                                                      |
| MuHV4gp05 | 44845      | MANFHFFCAVLV <b>G</b> LVGVNGDNMCHHLPMQPTLTSPKFTPPVKSGTTLQLRCPGFTPGAGGRKVTCLGDNMWTTVTPCNRKRCPHVTFTPTNGGANHFKNDDTSPSYGTEAVFYCDPGYNLLGESKLFCELDQNNKVGWSGESPICDIKKCAPPEVKSPAYILRAKDVNTREVFTRFSCPINLKLGYTHAVCEGPGWDPSTSPFCLQIEPCGQOPTIPATHIQTSPGAPPGRSELVNCDPGYMPLDGTLLTCEGRGVWKLPLPECVASKPGNDGHSYVTPGISEAPEVPTSDMSSTTWSTRKLTSTNPPDPEVQTLGSYEYEPDEPVYPTSPQTASTASPVTTQVPPPSSLM <b>M</b> VFKLLGLLLIIPLL <b>I</b> SVAVLGLFLITRCCRL                                                                                                                                                                                                                                                                                                                                                                                                                                                                                                                                                                                                                                                                                                                                                                                                                                                                                                                                                                   |
| MuHV4gp06 | 44846      | METTNVCSQAPLGP <b>A</b> GYIYYQLVDDFPLEEASLLSTNFTSAKACLLPLVTGLTVEPGFNFNKAPCQKIMFESLTVKPTKYFNHAIVFNHNSNKIPPIFHGRGLEQLCEATRLMFGSSFKPDASKGQWKSSTHLPQNPEKYIGWVVVAESFKERLICGELAML <b>S</b> APMK <b>T</b> VTI <b>I</b> NNKLCFKVPLHDTRFLSSDQLLPFYDENVSRIMYESYTTNVAQAVRIRDVTGLIEALQERAVTEQYKTAKLASLKYPAENCGAGNLEYAVIDAAVSELAVSHGLAFLEAPQEE <b>S</b> PI <b>Q</b> NYVQW <b>P</b> MFSEDATPEGRIKALQEWNAKMAIHVHAQVLSANSVLYVTKVQSGAGKAVGGKQDDMFLGRYYMQHGLHNTLVQTRDENNTVFPVGPDSCMNG <b>S</b> QYTVHHLAYAASMSPHILARLCCYLLQMCQNQLRSLTQQGTTPAVYTTTANTSMQDLCCGGDLPAVC <b>L</b> HTLFFRLRDRFPQVLATQKRDPYVVTG <b>A</b> GP <b>H</b> ND <b>M</b> E <b>L</b> GNFGSFKEKDDQDENGQRYSYWMQLNANLTERLEEIGVTASTPACQLITDVSFLT <sup>22</sup> VFKKIDAI <sup>22</sup> DEETIRFNDGLVRNNIN <sup>22</sup> YKESVKSIAHVLQLCNTNWLPPCPIIHNLFTRSFFTLQDMSFPLCVTHHTENPLNYGTVSTW <b>M</b> SNHFQNLWSNFKSIWFDKGLLTCSMDMRVYHTETSSDMENLAADLPKQRCAIRLSRAQIFAPKALKIKNRIIFSNSSTESLSASFVKAGKAENPITAGPYMHFLQLHKQLPFTTKTGAYYIWQTFMSSKLPQAGSTNAKKLSEF <b>S</b> YLM <b>T</b> SSLAHDEVNVL <sup>22</sup> DYVPTTLMAYAK <b>Q</b> RLLNNAILRLCGQTQFYATTINFLQPTILSMPSLDYPHVAGVPVQDLTTYMDMTRDQSATVIQSSCREDP <b>A</b> AVCKMR <b>P</b> IVTIPMMVNKYSGSNGNNSIFQSGNMGYFMGRGVDRKLLPDIPRMRKHVNTSMRRRYAFASPMTE <b>S</b> LLTQPGKGTVRTYQLEKTRKIIHDIIASGNAEPENLVLELVKCLGHCEATLSDDEVFYLEDGFESFMVNDVMEVLETLKASGCAFSEESVQALLPTS <b>S</b> PGTSESFVEVTDNIISTPEISVTQFTAAPPKRRRIATFED |
| MuHV4gp07 | 44847      | MSKE <b>V</b> AVLYAQIYGLCMDLSLVPYMDPSSLNLS <b>S</b> NNYHKL <b>C</b> QIQKIIGGQLENNTQTPCALTLE <b>E</b> LLCNAVE <b>L</b> CKSVLSHENTYDHLVCSKQCVDVSCCLACFYGGDTVDIPLDTINKIDMLFKLNVTFYCTSFHQTLPLLRNVFAQLGKFRGVSPISPGIYDQCPCIQCLQQVEYLPNQGLSKDTLLRKTICNHVFPMPPEPIDFAQVEESPCAVSKPLEHDKAVLARPMQAMVEYVNFSEPTSDVLQSLNLLYWTSCQLTSSNIHCSNLSNIYTRENKLLNASKQVGLSCHRSLRKYTPSPFELLFTGGLVTEHSKIVAALKDDCTSSFLKKTNYADSLKHKHNEFMASLQSLLTGSQPSQKLTQENAPQQKNPEKGFAYDAHKRKEAYFKKLADEGLKRLTNSLDTNIGNLEKLLGIRIWGQSVYAE <b>L</b> AKLLNHFL <b>R</b> KFLVQNA <b>T</b> STDWTVEEAREKSQFIKSILYGHNSINREHIQ <b>S</b> GVY <b>Y</b> K <b>L</b> LNGLIKERGLFKLPINILLAQSLDAAEVLPHQKIA <b>M</b> CFD <b>V</b> TNLKSPKDWIDV <b>G</b> LNQFY <b>N</b> FLPNHTLAGVQEQA <b>W</b> YRIELVLSVTYVNIWEKLSICSPSDFQDIKDFEARSVDLDTVCLTFEASCPILISKNQLRVFKDIYTMNLNYHLY                                                                                                                                                                                                                                                                                                                                                                                                                                                                                                                                                                                 |
| MuHV4gp08 | 44848      | MYPTVKSMRV <b>A</b> HLTNLLTLCLLCHTHLYVCQPTTLRQPSDMTPAQDAPTETPPPLSTNTNRGFEYFRVCGVAATGETFRFDLTKTQCPSTQDKKHVEGILLVYKINIVPIYIFKIRRYRKIITQLTIWRGLTT <b>S</b> SVTGK <b>F</b> EMATQAHEWEVGDFDS <b>I</b> Y <b>Q</b> CCYNSA <b>T</b> MVVNNVRQVYVDRDGVNKTVNIRPV <sup>22</sup> DGLTGNIQRYFSQPTLYSEPGWMPGFYRVRTTVNCEIVDMVARSMDPYNIATAGDLSLELSPFQTFDNTSQSTAPKRAMRVREVKNYKFDYNNRGTAPAGQSRFLETPSATYSWKTATRQTATCDLVHWWKTFPRAIQTAHEHSYHFVANEVTTATFNTPLEVENTSTYSCVSDQINDITSEYIQKLNNYSVASGKTQYFKTDGNLYLIWQPLEHPEIEDIDEDSDPEPTAPPKSTRRKREADNGNSTSEVSKGSENP <b>L</b> IT <b>A</b> Q <b>F</b> AY <b>D</b> K <b>L</b> TTSVNNVLEELSRWCQVRD <b>T</b> LMWYELSKVNPTSVMSAIYGKPAARVYGD <b>A</b> ISVTD <b>C</b> IYVQDSSVNIHQSLRLQHDKTTCSYRPRVTFKFINSTDPLT <b>G</b> QLGPRKEIILSN <b>T</b> NIETCKDESEHYFVIGEYIYYNNLSSIA <b>T</b> LD <b>T</b> FIALNISFIENIDFKTVELYSSTERKLASSVFDIESMF <b>E</b> Y <b>N</b> Y <b>T</b> Y <b>S</b> LAGIKKDLNDTINDIRDRLVQDLSDMMADLGDIGRSVNVVSSV <b>T</b> FFSSIVTGFIKFTNPLGGIFILLI <b>G</b> IFLVVV <b>L</b> NRRNSQFHDAPIKMLYPSVENYARQAPPYASAPPAIDKEEIKRILLGMHQVHQEEKEA <b>Q</b> K <b>L</b> TNS <b>G</b> P <b>T</b> LWQKATGFLNRNRKGYSQLPLEDESTL                                                                                                                                                                                                                                                       |
| MuHV4gp09 | 44849      | MNFYNPYLKRGSKKKADQPCQERAGATENIQRILPCLFQTPGTSGYKTFNSMLPPVTFLNDQQINLPLQPGQPPWTPPNNTASIKQKGLVENLKFHVYDISSCSYQDRCEDIPFRFQADIIPSGTVIHLLGKLENGQSVCVNVFG <b>Q</b> K <b>I</b> Y <b>F</b> YAK <b>A</b> P <b>N</b> SLVLS <b>A</b> IQEVMSQFKGKRGPSFHITQEEKIPLVTYTEELTKVYKVTLSSSQLLYPICDKLKALGIELFETNV                                                                                                                                                                                                                                                                                                                                                                                                                                                                                                                                                                                                                                                                                                                                                                                                                                                                                                                                                                                                                                                                                                   |

|           |       |                                                                                                                                                                                                                                                                                                                                                                                                                                                                                                                                                                                                                                                                                                                                                                                                                                                                   |
|-----------|-------|-------------------------------------------------------------------------------------------------------------------------------------------------------------------------------------------------------------------------------------------------------------------------------------------------------------------------------------------------------------------------------------------------------------------------------------------------------------------------------------------------------------------------------------------------------------------------------------------------------------------------------------------------------------------------------------------------------------------------------------------------------------------------------------------------------------------------------------------------------------------|
|           |       | DACQRE MIDNNFSTFGWYTCDVADLRQSKKDSLCLQLEIDCGLNICHHPLELSSWPPYNILSFIDIECLGECGFPCAL<br>KEQDCIQISCVTWNCAATNSISKLESLGTCDEJEGTEVEYCEPSEYDLLMFLIFMRDMSGVEFISGYNIANFDLPYIIDR<br>ATQIYNIDCTQFTKLVMTMRTEFEVRKPIDSGAGFMRAQTQIRISGVIPVDMYTVCKDKLSLDSYQKLNVAHKLNDMEK<br>EDVSYKDIPILFEKGTGRRAKIGTYCVMDSQLVDLLKGVDFMAHIEAIEIGKAKIPVRRVLTDGQQIRVFSSLLDAARR<br>ENYILPSNQAKCSNSGYQGATVIDPITGFYNTVIVDFASLYPSIIQAHNLCYSTIIPDNKLMQFPNLTADYETFTL<br>PSGTVHFVKKHKKCSLLSRLLTKWLAKRKEIRTQLAACEDPITKTILDKQQLAIVTCNSVYGFTGVASGMLPCLQI<br>AETITFQGRKMLEKSRAYIENMSSATLGALMHKTYNPDAYFRVIYGDTSDFVETQGYTLLEVEFVGEAAADNTTK<br>ALFVQPIKLEAEKTFKSLMITKKRYVGTLSNNKLLKGVDLVRKTACKFVQSATSQVNSLLEENLNLDNRVRAAQMTSN<br>WGKLDVYRRGLPSGFSKVIDALNNHNLQILITNSVDIDHLLTFTTELSKPLTEYKTTNLPHLAVFKKLVSQEEELPQIH<br>DRIPYVFDGSEKGLKSDLAEHPAYVRRQNLRIAHKVYFDKLVHSVANIQLCFDNDTDYTVKINFLNQPNDISEIA<br>ELLNIQTGHGEVCLDYS |
| MuHV4gp10 | 44850 | MEKSAPSIILNHWCVTWQGHHLFCLRNLSNIKLNRRNGYTTDLPLTLGDLTQYRLAHLSENLMALSPYSWTIPFL<br>VSSSETPGIELLPKVINDFGTPLSLAIKTNLPSIPAHQLLFYIFLRPSPLTSMSCYARPLSLASTPSTNGLCQSSVSLD<br>NKPGLLITTPLRHPASGKYTSNVQSPPTFNLEFRVLYIKLSGEEMVSKVKHLTIDKDSLQEGFLQCLNMCGVS<br>YETLQCEILLELVQGPTNFIFPAAFPPVSLPHRNCLIELCDTERCLKPQGDV/MKLKHRLLYELGQRRGDTQPNAFLIV<br>GAHSPETVWISPSLWLPQQLYINIINLSHKPLLSRHSILALAIPISYTRAPASAEATDITTCISGNSRVLTCGAH<br>VLEAHFKHPPITSRAITDGGESPMEWQTL                                                                                                                                                                                                                                                                                                                                                                                                                    |
| MuHV4gp11 | 44851 | MAESHPWSGRPSSSPRRSSTFANYAWKHTIKPNRILIRNARPLVINFADRLPIIKPVDQIILEDAGTVGSALNLPS<br>SICRTRPGLLLFGHYNNDVPTPLVDFKPEDEPLQVLTAKHTIVPPGEFVMIIVCVNFEEKSLDLIHEMSTSNIPLP<br>TCGQTFKNFNTATPSLEIYGDVIECNDQKTCVETAVFPLHRRCSLHGPLNFMGFVNSVNTGTLRVYYSVSE<br>AAPDSILVKFTSSAVAFSKNCPQGHVPSHDDTLIPLVTGTLLRLLPLETISIPNTSFVAQNPDLKAIIDNNLKI<br>RISATMWTGEQTPILAHNLTAAVKLIHSGTVFARAAFFSTKMKKACTLKLCPSTILLPGGELSLDSTLPCNCFK                                                                                                                                                                                                                                                                                                                                                                                                                                                               |
| MuHV4gp12 | 44852 | MDSTGEFCWICHQPEGLKRFQCGKGSAAVSHQDCLRGWLETSSRRQTCALCGTYPYMKWKTPLREWWTGEE<br>EVLAAAMEACLPLVLIPLAVIMVMGTWLVNHNGLSPRMQVVLLVIVLAMIIVFSASASYVMVEGPGCLDCTAK<br>NSTVTVNSIDEAIATQPTKTDLGLARETLSTRFRGKCRSCCRLGCVRLCCV                                                                                                                                                                                                                                                                                                                                                                                                                                                                                                                                                                                                                                                       |
| MuHV4gp13 | 44853 | MTAVSGMGAEIQLCSHPIGLSKNQRSNPTKLDSAKILACSLAQSKQPIRWEADPYNNMYSIYYMELTLPPTPCR<br>MLPQYQEKYGAUGRTPYWIYYRKTLYLEIPLSERVGLKGGDTKMGIDGTHQRDPPFYKPTPPPPIPVEKHT<br>GWSYLCGYTWWTP                                                                                                                                                                                                                                                                                                                                                                                                                                                                                                                                                                                                                                                                                            |
| MuHV4gp14 | 44854 | MAHTNGLHSINPRPLHIFPLFWRSILVGPTCAIIPGGHLKLVLLDFVYSDIKAFTSLSGSFWFCSSTCADRFGFPS<br>RAGARIPDLGFLPSWGPDRPPRPPPELGGPSPTSPAPSRAGARIPDLGFLPSWGPDRPPRPPPELGGSP<br>TSPAPSRAGARIPDLGFLPSWGPDRPPRPPPELGGPSPTSPAPSRAGARIPDLGFLPSWGPDRPPRPPPE<br>LGGSPSTSPAPSRAGARIPDLGFLPSWGPDRPPRPPPELGGPSPTSPAPSRAGARIPDLGFLPSWGPDRP<br>RPPPELGGPSPTSPAPSRAGARIPDLGFLPSWGPDRPPRPPPELGGPSPTSPAPSRAGARIPDLGFLPSW<br>GPDPRPPRPPPELGGPSPTSPAPSRAGARIPDLGFLPSWGPDRPPRPPPELGGPSPTSPAPSRAGARIPRPS<br>RPPPELGGSPRFRPRSRPPELGGSPDLGFLPSWGPDRPPRPPPELGGPSPTSPAPSRAGARIPVPTFAPSRAGARIPRPP<br>RPPPELGGSPDLGFLPSWGPVPPSRPSELGPVTKSSQKNRYTIVAPSTNILLTHATLLQ                                                                                                                                                                                                                                                |
| MuHV4gp15 | 44855 | MADAPIYVGGYVDIKKYPTLEKELVLDHDLRLLQAVPSFKPVPINVEHLADAEGVWVQTIPASHGLFCMGEVTNKG<br>FLHLVTQMAEESAASHITLTKQLPREPTLQMLHTWLPESLSSISPHLMNSTPDTIEFHVALCALGKRRGVVAVY<br>GHSLDWMSKFEISKPEISAIKECVESVKRHPGNQRPLNFSISMDLLAKAIDASFIKNRDLKLSDRQVAVK<br>QSAYLKASHVPAQADPDPISQPTQSAIMTTVTAGMEENNLISVPKATLISLTKAESRQRPQGGQASVQILQPFOT<br>PSSAITNHAAFSTPGAGLSYPHAGQWPIMPWSPYCPAYPLQASEGAPQSGPYWPPMYSYGHRDEARAGKRK<br>RECEEEQVSPGETSKRGLYSELLSMAGSIASLKSELQSLKQSLPACAPPSTPASAYPEAGSLLOYPGRHINP<br>QQCYMSHPSPALPAASPAGAAAAPPVTVVESVRRPPEVPTVPVAQSVREPDALVTTTKTVPAKRVDAKLA<br>NHEKSKVQLFCEELSK                                                                                                                                                                                                                                                                                          |
| MuHV4gp16 | 44856 | MSTYPPTYIGASAMLGRYVIVGKPMSPGLQALLSKILFKDKLNTLSSTELRLLHAILCHLYNFTTNCYLFKYALYNTG<br>TYDNGVLGRKVPIQFWTLLYEVLCESGLTTKDLTDETVAAASLWYRLNTADDGTLGCFCEKIFKKLGLTHHVALDLV<br>NLRDGNLLFNLGSTIPCRLLMCLLFCLKNWGAQGLEPWVRHYVGLFLLYLILAGYLLPRKECVEFAATQSYAGLM<br>ETICADILTFQGSQALSPPDNLQELDQLFTFNNSFISYTTATVTGSAPNTQK                                                                                                                                                                                                                                                                                                                                                                                                                                                                                                                                                            |
| MuHV4gp17 | 44857 | MFVYLNPNPKNTRIDAEALTETRRLAARAWDLKYQMTQGMHQMLRAELDNLLEILERGHSAAALTNLSLLANV<br>LLDQPAPPDPTQGEKGLPSSRVSERTGVYTVYVPQDPAFEIQDSLQIPQKIWPMLYLHQQRWLPQSYGPHIR<br>FTSSAMQLRNFRSLRGOANFNQNSMCLKLITALTDVISRISLDFYSDLRHLSDTMSALCIAAYSEKNQTLPLTNL<br>PELLGNITAKVTLVRLDKRAANKGFNFNRNSSLLPAQGGLYSNDFQEHALYSFRTAGMLASSSPPEYPR<br>DSVLAITAAVFDGNIPFAAYQWNLRSGLKALESLIILLFLLLDVNVNPAATSNKRLHLEALLGESYKSGSRPPARRTGP<br>LDAGGSVFSLMENYLVPTELLHRPPTNMALFPGLLYLLQLEFSSGASTPHAILTDVKFRDIFNILVQSNVFDQSDQE<br>LIRAKQLRVSCETGSGNLLESPLGTMTDIRKEFMAQDVYDVFVCFVGLALPVTVAVV                                                                                                                                                                                                                                                                                                                    |
| MuHV4gp18 | 44858 | MNELGAKQLLNKLPKRARRAGLAHVRCYRAMQGASNILQLLESKIAHQITHPVGSRLFFEVTLGRRVVDAIIVF<br>SESSPHIHCFLIELKTKINFFNQHSTTREAQKVEGNSQLRDSAALAVLAVPGTDPCRVTAHLIFKSQRLNLTLS<br>YTLNWMTHTVNTQVALLNLFGLRADNELRACLTRGLPPANSPGSRRHVCLPEPKPKHLKNRRGGGAHRNQK<br>ARRQGVGPKVSNKTRNAPTHAERAG                                                                                                                                                                                                                                                                                                                                                                                                                                                                                                                                                                                                  |
| MuHV4gp19 | 44859 | MASGGKNPQFPDSDSDEHVYAEPEEVYDNPFDAMRRQGVYSLLRPPYNRQEAVDSDDDATYATPSFDRIITR<br>RPSTGEVERMPGTPSRPPPEQSDSESDYEDIGAYGQPQRSIYQTPRRSTIRCKVSSVGENYDIPRDTQRANTVY<br>QTTHGGARPRSRAPVLRHPEAGGKNPDFLVDKLPSPVQHPVQGYEEMAGSSPPPERDVRSRPPQRRPNP<br>PVIIIFSDSESDAEAVGERQGRKSDVPTSWKRLMKTETGTSKTAFDKLKGSEKFMGNTKNEGTEEHRS<br>VVRRRDGCGRFRYSYMSKMSTDFPAGPTRCATVLYFDGGIAVGKTTALAAAFLHNILVISEPIPYWTSTFDKNV<br>CQYQYDVVKTEKGGKHSKKVLQCMFAQPFHATQHLLRRTCLGTKVSDGTCNNYLIDRHMSPTVIFPCLFF<br>RLGVLRFCDLKLLSVFSAQKFDNVFLFKLHPKVAATRVERGRNPEGVNIHNTYLQLLNEVLDIFCAWELLAIVPP<br>EVIVDAMLSTSVKTVFQKAGFVAPRARLMEQMFRRDRENVRQLPLHGSSIPTLLHKFCYELSKPHMMVKLD<br>AGQFPNDVPLGWLTHIYQILTDPAIKTCDLKWNILEKGISGGDPQ                                                                                                                                                                                        |
| MuHV4gp20 | 44860 | MVTCLKNLFLYCIFVSMVWLVHGVGDSDSGEGATIKVKNRNDNGVISVYIDGKDYAIFNVTKALQDLDGRDPIRQI<br>WRHSDVFKPLTRTLAERDSIFVTDITIHDSDFVCPVGRGYPTITSQVQWKDLPYGLGKFGWQKNMALKEFN<br>ENERFTMFSENEREKTLLVVGKDYVEYGLTWMMPEWGGTYGVVNTSFAFVSNITVESQVCSAIIFSHNKG<br>PSFKGSIVPEKLIQKTLGDMYFANFKTPVCQDITIELQNLVQMVTELPENIMADIANDVAVSANCHPLKIP<br>VPRIRTFKLTISHFLTISGIVATKDTDQDVGCLIQQLADLRYLRESLSACSMAYSPHMFTSNFLKFLSGVQIERL<br>ATQIPQADMSRAMMLRFGITNYNVSAHAFTFMEEMFENIYREYSYVYSLSETRKAMMGVSETLKHVAKLWVFT<br>TKDLIKLFTIATSMCTNNEISTMVERHAPLWDIDAETSPCYLSLRFDFSANKINFEVEQTSQTLTPKRTSGGVSGL<br>TDLNHNHLDLVATLPPFKLSVINNNDVILPLEKITYISKEAVPGVTYDVVAETFLESKLVISVFTDECQPALQD                                                                                                                                                                                                                            |

|           |            |                                                                                                                                                                                                                                                                                                                                                                                                                                                                                                                                                                                                                                                                                                                                                                                                                                                                                                                                                                                                                                                                                                                                                                                                                                                                                                                                                                                                                                                                |
|-----------|------------|----------------------------------------------------------------------------------------------------------------------------------------------------------------------------------------------------------------------------------------------------------------------------------------------------------------------------------------------------------------------------------------------------------------------------------------------------------------------------------------------------------------------------------------------------------------------------------------------------------------------------------------------------------------------------------------------------------------------------------------------------------------------------------------------------------------------------------------------------------------------------------------------------------------------------------------------------------------------------------------------------------------------------------------------------------------------------------------------------------------------------------------------------------------------------------------------------------------------------------------------------------------------------------------------------------------------------------------------------------------------------------------------------------------------------------------------------------------|
|           |            | VHRTVPVIYNISDSRCQFCGSIIMSDESQGFLLAAMYVSDKTIQTNLFLPESPFDDNHNTHVHYLWLMNSGVSVEL<br>RGKYRRQIQSVFLLFAVISLCLCFLCLVLIQIYIFH                                                                                                                                                                                                                                                                                                                                                                                                                                                                                                                                                                                                                                                                                                                                                                                                                                                                                                                                                                                                                                                                                                                                                                                                                                                                                                                                           |
| MuHV4gp21 | 44861      | MLRILKKDCALTGGEVTLANQTKIFYVIKAPSLCSLVGSPSSDSVTSQELFKTFCETPLSMPLVSTSNPLLSIVRLM<br>VSPKPYDLTGVLCFGEDEHETHYLRLVAKILMTQEEELDTICDIELHFSNETLSSNRVPSRLTESIFPLVPTVHFP<br>QNMILSRGFFTTGGNGPIIKHVAQTHHLTSDFMARVYALKTPQAHAQAAQLYRGLQIMNHAHNGLDFFPSSDSIN<br>DMQMFLLKHVLLSRKGTDSACQMFQAYLPAVEVLGPEVIERVELALAKIELANNTVFCMSTISTIVRPIQVTT<br>SANIKYIRMANKYFTMFPPINKDTAVIFGAAVLDQICKETPIREIVLVRKYAHVVRPHPTTIKLYTVLTL                                                                                                                                                                                                                                                                                                                                                                                                                                                                                                                                                                                                                                                                                                                                                                                                                                                                                                                                                                                                                                                            |
| MuHV4gp22 | 44862      | MTIFLVPFCDLPEVYQDCEYDENSQSLIFWISSNTYEVVENVQQFNILGKDLTFCLCRALRRLLLGIRLYPTCNES<br>NRYVVTGDRYVGNGLVVSPTGRHIQRIDTCTYVPIVYSFEQTAHYDGMGPGLRALYHEQLFFKGDYSFVSTL<br>IRFLSMKQIDECYYSFIHTLEPWARSACKKNYLKTECFKNVALTKLPVVDATFHLEYIKFNIKCFDQWNCPLDW<br>VLRRITISANLSKHKLLATIGRLMSVEIQLRNPLAYHDHLLTMMKTFPQVITISAQKKPTTCLNQKLEIVMSGTESMWL<br>VYTPASSMFRIMLCAAYISDIYNNVTQQAIYDVTHDKPSNGEMLMNLRYRIDYLPKDSVETIARCVSTPWPENPLIE<br>RPPTMYHEYCPKLNLSINFKVTIFNTNMVINTKISCKKITPRFRSFLDIPRLTNNFVVKKYSVKEPESFTISVFYSDDL<br>KSGAININISGTLIHFLFAMGCLKCFMPIKTINPVLISNWNSTFDLQGLNQEIVRTGRHDVFWTTNFPASVSTKRGY<br>NISWFKAAATVTSKIHGGALLDQVRGEISQILLSSDAIINTNKNCIYTTLEKRNRFQIQLTHKRFLECLFESCVASKLN<br>YHTVKRCLCSTGIFDFSRHIISHSKNHECALYGYRKCNLVPKILTGTKKTRDELGRNSNYLSFNKSPHLHKKDASD<br>FKKRLCLNRRRSNCPQPD                                                                                                                                                                                                                                                                                                                                                                                                                                                                                                                                                                                                                                                                                        |
| MuHV4gp23 | 44863      | MDAPVENRAFAYVRTGANLTSQIKESAAEGLFKSFHLLVGVKNVRENSVRFEALLGVYTAIEFVKFLETSLAIAACL<br>TEFKDLRRMVEGKIQFKVSVPTIAHGDGRRPSKQRQYLVMKSAHKHHISAEIELSTEDIELLFAEKETQLDVAEYVG<br>AVKTTISALQFGIDALERGLINVLTSKLRQAPPTFILQSINDPSAAQRGFGKAAKSDIVANFKKHLLEHTFFLDLDDL<br>RSQRGRDYVLAVLSDAVAVNSSEVFKGADFYTTEGGEVPSGVFETTDGTMQKLLNLVGGATSSIMAPAAYANY<br>VIRGGNVVTAMSYGKVMKNFDSFLSRMIENGNTKSTPENVDFYENGDTMDVTKTIPAAQIRIKEVFAIESLQR<br>MYRETQQAYPLIRTMQYAYFPVGLYLPDPKYTTSGLTRGLEGGSPLEAWVKNLNLIQCFTFDNALKMLCHPR<br>FHNPQLCQNLPGEEFQHDHILGYIQSRQIGHMNLRYMMYGYDGVKAVAHIPDVVAKSELSTSELSPMAHLR<br>LELHPLDFDYKIRGANGAIECRAVHRTHVGNIEAFAPKPFQEGRQQLESAGLSHVIDQQTMELIQETAADFANY<br>LPMCYVIEAMIHGQEDKFMITSSIVALITTYWNNHTGMLAFVNSYFMKIYICKFHAGLINDPREYLYYKXMAELITMEQ<br>TLLKICGHEKVANVSVGQYFNSIMDPAALLPPFINDDILSKALKNKQRKVSFYIGDELYDNQERRDVIKEIDTLENSY<br>AAFDDIYDMHADHENRKLVLGPEPAGDLILEKLYFYVFLPVCTNGHVCGMGVDYGHVITLGFNGPVCLPNV<br>NGGDDLQHLANGPLKDLLASDLKPTVGMIRLLVACSLTTPAVTQIVRVEAERDSAQQLATHESGTVRHSVLVN<br>GIAAFVADRNKHVIETMFYPVPHKFYADPVVAATLHPLVNNYLNIPSRQNGICFNPSEFMAEYEEWHKSPML<br>KYVRDCDVPQCALSTMLAMHMKLSPMGFIHMTKLVHPGVALTVVRTDELLTENILYSNRASTSVFGRPTVKRRE<br>IRADAVGFDVSNIEASLDTAMGYSSTLIPARVAGITDMGIHCQDLFKMYPTDNFKNRELTFIKNKIGSERAPNANV<br>VDPLAYMADPRHGSEMCLAHQBLATCEVILTPVTSDLTYFQSPNSPRGRTGCVVSCDTPSPENAAKLLYDHGQ<br>PDPAYEFRTTNNPWSQIGSLGDALYNNHNRQLVTPGLYSPCRQFFNKDMLLNKNSLFTLHIEYITRLGGSPATS<br>NTDVQYVINGTDVLEQPCMLLQEAYPVTLASHKVLLDFMSPNKKKGHAPVHNHKLVEEVAPLKRVMLKIGNKT |
| MuHV4gp24 | 44864      | MASNRNMITLTSRLYADEISALQEMVGAICLQHYHQVDVTSIGLGHIRPEGPVDMIAAFHYLRRCTFGILHEINP<br>DSISIRVDPGENYQIKNTSKPYVMWDEHDDLAIPIPIFGVQQCTIKLDSNDVNLVFPVVPAGLAQMGIKILMYNL<br>YSNLLAERNHNDVNALEHYTRNISYMGRTYNLDMAMAQHQDGMAMVLDVAVMCTAVLAAIVPEVCNRRVAMATIR<br>EGQHPLEVEFADNVPMQRGQELNVEQDIMLMLGFMAYTHKLGISIFNLSTRLCLGAYSHTKIGTCWL                                                                                                                                                                                                                                                                                                                                                                                                                                                                                                                                                                                                                                                                                                                                                                                                                                                                                                                                                                                                                                                                                                                                               |
| MuHV4gp25 | 44865      | MPEEIELRSLGRNSSGEVVLNNGPYHCSENSRCPDCEKFSYLAYSFLIFLTVLFSVYLFLVFCPEIKHLYGTWQSG<br>DSILAGEVGPILNRTVTSKSCWRGPRCEMFIPNIPILPNDTIYPNFTNYNGSYADYRITLQEIHTILYDQCNVTLLH<br>TSFGKTYGMDVDFVFKTVMYKLITSFLMEGSTMCDLKAARDVYVHLHSLHLDVGVGCKLRLDNIYDESSGSHYS<br>RECVKQFDCMLCIYPKSISVSFN                                                                                                                                                                                                                                                                                                                                                                                                                                                                                                                                                                                                                                                                                                                                                                                                                                                                                                                                                                                                                                                                                                                                                                                         |
| MuHV4gp26 | Seq 597855 | MWVYSENYTMTETTTISGQTSSGFSFHVPIMVIVLILLIIGLLLYGAYKCFVWVWYKRAQIMGLPAQALLSRVKV                                                                                                                                                                                                                                                                                                                                                                                                                                                                                                                                                                                                                                                                                                                                                                                                                                                                                                                                                                                                                                                                                                                                                                                                                                                                                                                                                                                    |
| MuHV4gp27 | 44866      | MLQKDAKIFFISSVNSGEKTTSFYLNKLDANEKMNVSYSVCEHMEFDFNKQSAITACPCYRLVYVEFITINDNIK<br>TTNLLLEGSFATELMGNMQSHTVEVSGNSMIHESLTRLDFYRCDTAGQGAPTENTLTVYIDPAYGNNVHASGTG<br>IVAMSHCKHTKKCILGLEHFFLNLTGTAAHNIASCATALLGILFQHPWQIEIRCIIEGNSNQDSAVAIATFISHNIK<br>PTLFASYRDKTGMQWPIYMLSGDKLAFQNFISLNQGLLCASQTVVSNVTLSSDPISYLFQIKNTKCIYHKNKTI<br>TFQSKTHTMSDDVLIACVMTCYVMTTNKISYISFSIK                                                                                                                                                                                                                                                                                                                                                                                                                                                                                                                                                                                                                                                                                                                                                                                                                                                                                                                                                                                                                                                                                              |
| MuHV4gp28 | 44867      | MSAPGCSVNKSKNLVTDQDLLDMVNFNRPLHALIAEVSKTTSDELVIRSTTQGIENICLLDLVGTETCIKDA<br>TSV                                                                                                                                                                                                                                                                                                                                                                                                                                                                                                                                                                                                                                                                                                                                                                                                                                                                                                                                                                                                                                                                                                                                                                                                                                                                                                                                                                                |
| MuHV4gp29 | 44868      | MYKRCKRGQDKCMMRPLSNPLTEAYNVQNLVYQCLNCDYHLCNGLNCDPLVDREGIVCTVTGKYIQCNVRES<br>PMCGAACLDVDIHPEDNTDCILRALFGDIVDINKLDDIAEIKDKILAGDSLNEHIKKIECTFPMCANIINCNSQGSIL<br>CSMFVHIIMSIYANKTIYGHMLFKCTRNNKYDTIAKKIREKWMYLE                                                                                                                                                                                                                                                                                                                                                                                                                                                                                                                                                                                                                                                                                                                                                                                                                                                                                                                                                                                                                                                                                                                                                                                                                                                   |
| MuHV4gp30 | 44869      | MDVFRINKKSVPLOQDELLVDLLEPEHLLAIYGILPNRNFVYTSVCDYQSGHVLPHYRRVWVGKFMKAGESGGPVG<br>SQGLCVSIVRVHQNLSCLDMLLKVSNWDEGGFFRIKESLNLNLLRMFYITISVPPVTRLKKTAFEELCNQVSSDKPP<br>AHAASFLLSLLPNTVCETTKTHCALENPGYIRGSNPPTCQTQPATETLPCKNRRTERQPRTEYSWKLHHVENG<br>APYYVEDTHNPIEAQHIIHQKLLTVMTGDPAPAKPTDIFLMDTDFLHAVQNRFIDSIDLPGYKDGGLNIFQKFSIFITYD<br>ETTKHLYEIFLDSLITLRSKSSKYPAWLMAYYHGSPFQGVWLDIVNATATGEVFKGDSIYLGKCHEGLSPTSIDKLL<br>KGRGIFYNNLVLLVHSDLTAWLLPGLGVIKGTIYILGQEKAFVGRYGNRRYNSDISE                                                                                                                                                                                                                                                                                                                                                                                                                                                                                                                                                                                                                                                                                                                                                                                                                                                                                                                                                                                   |
| MuHV4gp31 | 44870      | MATKEDIQTFLNKECIVIVNKASCCRKVFCTTSSISPLKHHFGVDPDDGAWCLNVTVLILPKQSPFSVTVFINGK<br>PILCSNSQLISIQKVS GREHMAVIFYGKFTGKSAIPVMDPTILDGSDSPHILCSDVMESSTLVLDLPVVGSSKQVG<br>YTAWLANNISYEMLSTEHQMMCPSPVFPVPSLKNLIMTSCSTPTCKKACAGYRRHCKVCSGYTADTGDGYSPSC<br>PCTTSCALKPGDIIPITGHHTLLPLLDFPVNAHSVTRLRITPTSSPQLDQIITGITESGESVPITLAWKLVRLSDLYS<br>HLYIISCKALKSHLHSC                                                                                                                                                                                                                                                                                                                                                                                                                                                                                                                                                                                                                                                                                                                                                                                                                                                                                                                                                                                                                                                                                                              |
| MuHV4gp32 | 44871      | MFIASKKSYFEAVYRSTVSSHSEEFWKSDDPVYFTQYKQCNRLPNAYLGLTSHASKYSENFRHYVATFSNSPLD<br>FPQSVFNERNPCEYSVPYLDALQCSAKTLVGCVSSTTERNEYEVCKEATRCKFDAMSHKVLKVLNLSWFLK<br>GHYKSKQAFLEPFQKQILHSFMFVASIKCPETTTKLFDEFKFLLDMLYFDNTDHLFLQKSPALFIPRRHGKTVWIT<br>AIIISMLLTSVDDLHIGYVAHQKHVSLAVFLEISNILLAWFRPNKINDIKKENGVILYSHPPKMSSTLMCATCFNKNVSVI                                                                                                                                                                                                                                                                                                                                                                                                                                                                                                                                                                                                                                                                                                                                                                                                                                                                                                                                                                                                                                                                                                                                     |
| MuHV4gp33 | 44872      | MATLSDDFFPEADPVLEKNYRRCVDLAINMSWSVPGQFKLVETPINSFLLVGDVLPNDMIESKPVNSLTVNPPPLS<br>TLGVSTSKSVEVTSYKSETEKFEQEAASISEHSIRCSIVYEGLTWITAMGYNVDFLVNMLEQMKCPENWSGLHPV<br>DPLACVWLLYFGPKSRCSEIACVSELFIGKGPILLPPHMYRGDTSVNSFAHLLCQYVYKHLIYADYEPEILSCLPDI<br>RVKGLSCLDRQVAESCVRFLSQRCLLCHLYQNAAVSKNLTASDCIILGGSGKSLGLTYMKSYKDPATHDSLLPTY<br>NLEAIVNYILEHYGHETAGQEINWE                                                                                                                                                                                                                                                                                                                                                                                                                                                                                                                                                                                                                                                                                                                                                                                                                                                                                                                                                                                                                                                                                                       |
| MuHV4gp34 | 44873      | MDTKLLAKKLGSSLRADIEKRAAVSLTRDFGKSHSLTQFYTKAKRAERTASSAREHCHRIENMVSTKRELSDCV<br>SELTHLKEICQNFVEDAERLIEETTVLKEELEDTVNTVSAALQREESLADSEQEESDITCWRLDGLPTVTARIG                                                                                                                                                                                                                                                                                                                                                                                                                                                                                                                                                                                                                                                                                                                                                                                                                                                                                                                                                                                                                                                                                                                                                                                                                                                                                                       |



|           |       |                                                                                                                                                                                                                                                                                                                                                                                                                                                                                                                                                                                                                                                                                                                                                                                                                            |
|-----------|-------|----------------------------------------------------------------------------------------------------------------------------------------------------------------------------------------------------------------------------------------------------------------------------------------------------------------------------------------------------------------------------------------------------------------------------------------------------------------------------------------------------------------------------------------------------------------------------------------------------------------------------------------------------------------------------------------------------------------------------------------------------------------------------------------------------------------------------|
| MuHV4gp35 | 44874 | MDYRQLPRVLGEDGEDTAASSWNTFLLMQSIEGALVIPYEKFTMVSYMMYAANHVSTEDMDGKPSFIAPPIWER<br>CFHTKFTPGDTLGEGGFGRVSTMASDDTLCKIYIPKLTALYKEAVLMDIHLTSLFKPHGASNKVLMFMFACVCEQ<br>CIVLPKMRCSLDYREWSPNSVADTSLGFRGLIDGLLYLNFCTGITHCDVSPSNILGAGGLSDMVLSDGIATIG<br>PGMPGEIPIFSKMLGRVTNLYSSCPMFFAKRDIYRSTCLFLCYKAIKEQKAAESIPMYWRTPQEGLRDLCLCLYY<br>SFQDCLLCMAGLQYRGLDFLKVSPPPDRPGKYLAYMMQRTVVTFQICGVWGLSVETGLDIDGSSNIHIPRTHR<br>SYFKAVAEKALCLVRQQFTPEKRVTLSESVAQVVPFLRLDSFNHCHGRVDYSGFF                                                                                                                                                                                                                                                                                                                                                              |
| MuHV4gp36 | 44875 | MEGSIILDFFEKDDLEVLGNMARENQLESLATLNFSAFIRSPQVQELLATSKTNSVRISDMRLTYVYFLFLRLNEYIG<br>NTAIMGVFKDMMHLTDNSEVSAVYACRDVTPDIKYAVCQRIEALTRGQDNLDLWDLRDMISSKFWAVKQH<br>SINKKLFNPQPIKVNHYFAGPLAFGIRCEQTVKKILSELHPNLPRFHDCGFLPSAIDGIFGVSLDTAFNVFTDSSGLV<br>HFEPDSIVYEIKSRYKYQFSKSEFDGLAKKYLDLYKNPCEATFIKFINCISRAVEYVPHGKLPSESDYLITHSMNWK<br>TSNKRKRKITDSHICLKCKLLHNMYQQSTVYILSDPSETSGKITIKASFPIDVFNPAHNYFYQVALQNMVVDYIEF<br>GGGVYKRLGHQKNFIASGFFRKRHFSDDPAVCSIGNCGKLDTTDEIPVALIITVPRIPSTVLHEYLLKKAIDFWNQCAE<br>ANFDHIPWQGLSDVARKPITP                                                                                                                                                                                                                                                                                                    |
| MuHV4gp37 | 44876 | MGAAGFCCKKTHNPLKDVVRGQLIDLTKDFELISENTGLLVEDPSVGEHLELKPYPGSDTSDTSDTIEYERKHA                                                                                                                                                                                                                                                                                                                                                                                                                                                                                                                                                                                                                                                                                                                                                 |
| MuHV4gp38 | 44877 | MPALKVPLKLEPSRSDSFLLSWNTLALLTLLFVTSSTVPILASFRGVGFPCYFVNLVDYSTLNLTVRNSAKHL<br>TPTLFLEGPMEFVYVWSFLTEAINIYFIGAVTVYRLKKIFMPSLNAIQVWLTLLIGHSTLYLSIARLWTLQFLVHVL<br>SFKQIFLAAFYVLFHFM.SYVHVHVFISRYVPQWQANDMEQKIPEGSSLEKLVLFYRPILANIQMSLLALEMLVLSLS<br>VMMAVCNSFYLVSDAVFAGVNLFLISLVWHIGAEVFLAKYLRRHVGFYIGLFAVYIMLLPVIRYDAIFVTSRLHKPI<br>TINMTIPIICLIIVRIIRLRSQTSTKVYTKLGLISGAMAEQFQSPQPPRAKYTDLETESEDEL                                                                                                                                                                                                                                                                                                                                                                                                                           |
| MuHV4gp39 | 44878 | MCRLQWHDVQVLNVSLYNI SMPHKTGIWVITALKTATWDLCAFFRLEQLSETVPHIPGEMDPRPMSPFMHENIC<br>LFDLLMRYQSPLLRKLINLGRMKLGTSGKEILAVEEVETALTHQLTGGYLMCFGTTIRQEDDRGKLTWSKEHLLKD<br>FNLCQPQVYLKTCRQVYVYDSRDIPAKKGRLDLSTIEDIFSPVDTHLVAGSPITVTFETPFHILWIDKDSVWNGYL<br>SEFFRALYVKLYGNFIGLKPILAYVFAAVESPTFFNTIIFISFPFLCLRFGKPVKTSCHVHLQKDKLILAKLAVNIRSP<br>LADKVLDIKAQKPKITSMWPLLTKELNGSAEDNKVITKECNVVEIDFTKAFILISCNMPLYAVYWHQEMVEIVNVITD<br>EMKDSLVSRYNEFLYAISSGNKHNFTWVSISKCTVHMVGPDLVNDTQFLDEIFHRLSSVYNGHVGDITVSSQKLL<br>VAMFTDILDIEIKLPLCLEENRQPETFSQACEDILRYSLCLCKHSEKEDILWIKILLTMWQRRNTSFWLKETMNIIEHP<br>TIRPKGLFFTIAPAFYLHTKHGMSFWMQDKPLPSCFDYTPYIMELCDILQNLDEERDMILSNYETLLNLS                                                                                                                                                               |
| MuHV4gp40 | 44879 | MISSNIREARTVILPRLMLEITSNGTLTVASHTPIFQKLSLTLDLPSLTAHLKTLGSGMFGFLFATLCEDEHVTLLD<br>MHPHFVEKRLVLYNPRNTCNKELCALISMVENLMDCDPKPLPSIYMRGKRLFQKNPGKDSFCFLFKGLSTLISTHFA<br>VYHPNFTVNDLELLPPLLAYKMHSTIEGIDEVSKGLLKAIYLDYSRMDNNIDDFQNPAGTFTLLCLPTIFTKHLTPVN<br>VLILIKRAGLMEYEAIDNIIL                                                                                                                                                                                                                                                                                                                                                                                                                                                                                                                                                  |
| MuHV4gp41 | 44880 | MFMMNLSESAMLVHPTKNSMQLFESLKGKVVYVNGQSVYTSLRSSGMFSKQLFLHLRYFALNSCTYETLFTSWA<br>NFHNTMRKKWKGTTSSEDFLASSYASWVATLKLTLERLALPLINQLQYSRNLISYERYIDWVTLLGVVPAQVOPEN<br>KTTIQHLEDNLKVLVNTSGPGDKVITEMISSLIQEMKVLKTLSSLYIPDYSEVSIHKNLESGEWFYIYKSKRIPVEVM<br>AAPVLCKEYMFDSQVQVFPVTVMQCYRTQEHAKLQCLLNTIPVKTIYVGNASQSPGYKDILEHLEKSNKTDPKKEL<br>LNLLINLAENKTVSGVTDVVEDFISDVSNLIDRNKLFGNSNETTCAGLKKQVNSVFKLTKQINEQFDTIADLKE<br>RELYLARLQTVESHLLRIARNEKSIHDVDVNLTLADTMEVSLSEVRDLNLLSSTTEVPNGKSVLNSFFSQVYPPFREL<br>GKDLANLWESELMSTFKLVPEVDPQGMICVRYTPDTVSLLLGPFTYVITKLTSMDLIRDDMTSQQSVHGLVDVYK<br>ESRLLVYITDIGSKLGTVEVQLSTDGVEVLPP                                                                                                                                                                                                            |
| MuHV4gp42 | 44881 | MALSDRFIMNMTSDAKIRQIVTRIEDLNTVTTNIPDMCWYDSQYDPLDEECMNLPPFTSFIITGTAGAGKSTVSAI<br>HQQLNCLITGATVAASQNLSSMLKSYCPTIFQAFGFKSRHINMLCRQVPKTPITSIEQLQQYELAKYVSVVADIIEI<br>TQKKMHQYQNMSEELYELMCLSCQKPELWTTNIIIDEAGTLPYSYMLTTVFFYWFYNSWLSTPLYRQGVPCIVCV<br>GSPTQTSIAQSIFNHSQRNEIQCDNVLSVLMENQVLRRYIDVDDNNWALFINNKRCLDTEFSHMLKVMYGLPVT<br>DEVLQYIDRIVVYAKICDPLEYVGVWTRLFVSHQEVKTLFSSHLALAKSHRPNVVKLFTCPVCEVYVQTFQKY<br>KEKVNLTETIMDWLKKNMFKASNYSQFVDQDMTIINTDITEDCTRITYQAKYVKNFSISLNGKTKRCICGYSGYAS<br>FKQVLDSDGFLESHTRDNKYVYNFLSTLIFNSLYQFYAYGIQTGDKKYLASIQEQNIPSLLSDDETVEGLTEDIFYL<br>LATQPPLPSQSTITEINWYSAIKQVYLDRLQVATDHFGEFFLLQPFSTYTTNIHRDDVEFTSTETVITGLLDYASTV<br>ESYQLKGYTFVSVFQKQFSQRSYMSKTPMIIVQDSMGFISCLNTNFNKITEILEDGSSMVLGCTGDYGISSKL<br>AMTIVKAQGMSLSKVAVAFGKYKTLQSHSHAYVAISRATNPKYLVDRNPMRSELTMDTKSAGYITKALHNPKTL<br>VY |
| MuHV4gp43 | 44882 | MDPFKKPVRMLPIKGAPISRPISVFTFDVFNPPDSDGSSPDSVFEAETSPARTPPTPALILPYDYVSSEDSDDEA<br>QEHADNRDNDQVSESSTSESDSESESSCDDTQQTVDDESTSSSGEEDRDDPFESNDQGAQGGSTSESED<br>DLPAILRAARETQSDSSSDSGNSHKRRVQEESSRIKTPAPISGNKYNWPWLD                                                                                                                                                                                                                                                                                                                                                                                                                                                                                                                                                                                                               |
| MuHV4gp44 | 44883 | MDTWLKTHVWLSNVMQRDSVMDFLPQSWIDYQLSAFSSKLEQIMAAVENRRKQNVYVPSSEDVMRWAFSFCP<br>PENVRVILGQDPYHGGQANGLAFSVENFVPSLHNFQELKRSVPDFQIPPLGKLDKWAEGVLLNCILTVD<br>KGRPGSHHKLGWGWFDTDYVISTISEKNDKCVFMLWGNKAIKEVLLINGSKHLVSLKAQHPSPLASLGGYSSKQAPP<br>LGCNHESIANTYLTQHKNPISWNL                                                                                                                                                                                                                                                                                                                                                                                                                                                                                                                                                             |
| MuHV4gp45 | 44884 | MMANVLLCINADMFMYPGVLLERYAVLTQHHLFIMFGSLLKTVLTLAFVSLSTCDSKILPKHCCHISATPTEKKS<br>WNFLSSITEIYSSPSSCGNINVAQVKVTKTGyhLEcANGFGLMGFLAavSRFRDPTDDVEFLKQLKLLHDQF<br>DEVFASASTANSSSFKA                                                                                                                                                                                                                                                                                                                                                                                                                                                                                                                                                                                                                                               |
| MuHV4gp46 | 44885 | MCSKMDLETREGGQCQVSIILMVTSDREKEQYEFKMNILKNLSNCTDISQVADAKKIYDSREFCYVALLTLFKK<br>LPSVHKWPENENCNEVLSAFAFFVCQLLFFHNFPASPFTVDEMFAVAAARLKDIEYSCDCENCELLAESLTNYKF<br>SLVPIKIRPHTDTCVSLKTLQRLRTAMLGNPETLSIWTLDDLVEDPVVFKGYESAIRREFAEHVTCLNMCVWVKIILD<br>CMSQPTALLRDCIQKGAKNGLQDTSSTWTPAARIAEKEVIEHTMSVCVQDMTRSHDQEFYTEAFKEDLHIGL<br>KRLVAMVVGQNHSLWLDGFLTDTIVTGKA                                                                                                                                                                                                                                                                                                                                                                                                                                                                   |
| MuHV4gp47 | 44886 | MGDEFYYPSPLESVHTFCVIDTREHNRVSACLCKLQVLCKICQTLRHNLDTTEPFLPHLRELIIRHLTLERLSTTSK<br>FQRILDYMKLSLEANDSNLLQDLAIGTVNLLGCSQPEILSIPYDKQPVHEWCACFLTSDVEEARLKISSMLDNKHF<br>SYMNFKTLKYSLELETAADFDLSTGLNVLYVWVSVFKLFSVCVQSQFLDLSLAFNALFKNHVKELEAIVESDNL<br>LLCYSTSVVWAKLSNHLHLRLQTSNNTLVFDEILICLRLGQYIYKCLPTLSAEGESESEIAEIPIS                                                                                                                                                                                                                                                                                                                                                                                                                                                                                                          |
| MuHV4gp48 | 44887 | MFRNQKVRFNKAVHNRHPCGYISHHLIKYAIERYVYTTDRFLTAPCSGVQLPQLACSLFEILKDVGRKCTTAWR<br>RLGAGRRHLMFTGRNVLDEFNSEKSPGGISREVEAFIKICFPQMDLNKIPIYQHAINIPDCVPSCTIGDGNRKR<br>APHGSLYSKDISSQKFCIPDPLFASPTEPGLGELHRGNMAHLQNPTEEINLDPHNTTEPCLYQMFSEAMVNPSSK<br>RWLSEINMVFSGLSRARPETTYEPLGVPFSPISPGSSATEEFQFEFSPSPQTSPESESSYIPTNSAQCSFE<br>YTGAVQPLIPDNHTCSAKRLRESDEEYVNSDGSNPKPTARTSGHEQAYGFLAELLSSQSDRTPVQHIVQSGST<br>PAPPIVEPQQQDFVKGQDETCNSNVFPEQITQEACPGSSEDAFIDDAIKEIFASLSMANQDADSDTCSILDQPSPT<br>PPSPVPPITLSTLYDIYASILSPLDPNSLES                                                                                                                                                                                                                                                                                                         |

|           |       |                                                                                                                                                                                                                                                                                                                                                                                                                                                                                                                                                                                                                                                                                                                                                                                                                                                                                      |
|-----------|-------|--------------------------------------------------------------------------------------------------------------------------------------------------------------------------------------------------------------------------------------------------------------------------------------------------------------------------------------------------------------------------------------------------------------------------------------------------------------------------------------------------------------------------------------------------------------------------------------------------------------------------------------------------------------------------------------------------------------------------------------------------------------------------------------------------------------------------------------------------------------------------------------|
| MuHV4gp49 | 44888 | MCGVKSLAKCFLLFQIISFLGNHNLVWVPGAALGAAETVEGITSREMEINATKAPSSGATFSLLVTLNNPTTIMR<br>PPVAQNGESVHKDARSASADPTTSEPTSPGEEPTADPKAAPSAGHVGETEPEPTPLPATPKPSSQEDNPTM<br>TPPTAEPPTSADVSTEHVDETEPEPTFLPTPEPTPTTPTTTPSQNQDEPTLTSSSDADADTSDTSPKQ<br>EDDPVKPTESKPQAEPKDNPSPDVPETADSPDPAPTVLTPTTEPTPTVSPADSPVPQPTAPAEPSKPEPT<br>PPVDPATEPNTPADPSTPESTPPTDPPAPQPTPAEPSNPEPTPPVDPATPPNIPADPSTPESTPPADPPAQ<br>PTPPAEPSTPEPSTPAKAPAEPTPPPSGSMTEATPPSTAGPGAETETPDGDTTTQPASQQTAPMHPVDPIS<br>TLLWIRPTIAJLIFLLMTIFHIMYCVLHTE                                                                                                                                                                                                                                                                                                                                                                                     |
| MuHV4gp50 | 44889 | MASKKPDKTYEEMVKEVERLKENLTKLQKVKSSGAVSSDDSLTAAKRESIIVSSSRALGAVAMRKEIAKVRRA<br>AKAVTEQELTSLQLSLTRVDVSMEEITVVGASGGIGPSSQTETKKRRPRSKSRHRHDHE                                                                                                                                                                                                                                                                                                                                                                                                                                                                                                                                                                                                                                                                                                                                             |
| MuHV4gp51 | 44890 | MQVLVVVFLMCAFCVCGITQETTPTPKPDDSSDFYGHGCNADTYVPQWGSVSSVLAINGSIVTVSSGVFLIYACF<br>SKFLTMTS                                                                                                                                                                                                                                                                                                                                                                                                                                                                                                                                                                                                                                                                                                                                                                                              |
| MuHV4gp52 | 44891 | MKVEYSFVPKHFLECTHGWALTQGTDLDPGTRLKFONITPISVQPSEGTKVPLGLFIQKTSGFPLILNAICANSLVT<br>GHTGLIDPGYRGEISVILATAAQSTVEIQPGQLTIIYILPVSYTVPVITDDHLLKNPVYDEADAGDFRASEDLCLLPKTR<br>HTFQFDLTHLSGJAEPTFPVVLGRSGIACRGILVPTGINMAEKSLTLHNLTEPIIIPQGIARIAQIVFISKYSPLSQ<br>LLTSKECSMDIPGLAVVQFIRVPEHAADKSEIAEENRRYSKQRPGKPSREGRGFGSSGVN                                                                                                                                                                                                                                                                                                                                                                                                                                                                                                                                                                   |
| MuHV4gp53 | 44892 | MNCCGIWPFPGKPGVYKRLADVETDERMEMEIRLGMPPGVLAAADLIRSTKDKQVLEQLYLLAVQANNLTEHIKRF<br>TLGEIPEECKNVTRSQLEKLSVQHIWNTMISLAAGAISVDEATLPALLDKRAEETVALLEMEKIATAVKLDetaAAW<br>ATDAGIVSSQPLATPPSESPDQIALKKATQLSNVY                                                                                                                                                                                                                                                                                                                                                                                                                                                                                                                                                                                                                                                                                 |
| MuHV4gp54 | 44893 | MARYHSNSCLVSPDTRCISTDIDVIDAVVNLITHEGATEYKFTSLIHDCFSISGLKNISSISMCLPLNRPNKEKYYF<br>ELFKVDISCDDAKQFLFNGRPLTSGQVASCLEDYSHLKAQILPILKLIMSLDNRGEKEGTFLEMVRWYQSKLINFRLK<br>LLKTTSSSQWFIITFGQDDLFTFLVIAIYFYFYKHACTVETLMHLARLFCGELGHSIDVSSQLGLFFSSSSILDSV<br>PLFAEYVETKLNIDTLENEKIDQMINAIRGGLLSNKGIVQFVYLAFYACFNKATFLEFIGKTSFNINITYSSEILHLK<br>CDEFLDKMSYINKEKIYHTHLLTKVVRVPGASLGSYKDFPTGLTQAWFGQTSDLTALFDSINEDFPFYSSESLKE<br>LLKLASLSPQELDNPKDILFPEKICPYRSEFNKNTYFVMVATDSIEDYWKKHVIFPHSINDELTDVRITELLTYCV<br>NGCTSNTVEDNLMVSRHEYFNPHLPIYVILDFDLPEVPGYKIEDIYNLCLQIRQDIITVSTILNLEMPSPHPVYFF<br>KSECNSDIYMEPRPFCTCSKIGLRIITPLMRJAVGATPLITLARVINRTIRLNKRVCGLFSPISSTEFLLFDTGIYSQ<br>GRCIRLPHYKFTSTGLPERLLKLVCHFPDKTSYKNSFVLTNLLYHSTEDLRSGDYNLIDIRDKDEDLFDLCKT<br>VASLPKNSLIDKLEDILGCPVQSWIDTTLWPLFCEQLVKYLPQKNANELNNISFNVSNNMLQLKPRRGGPFSCL<br>THQHRTKSHNVRLFITLGFKSRDVTATLMSQCFANKCNNKPVTHCTVHARV |
| MuHV4gp55 | 44894 | MKKVSSQILHQLRSQRGQSGMWCTNLTHSSSTTHHQHPRQTSHELLQRLESAPCLLKLSTLLCLEIQQSMSLHPK<br>EAILTPDAVHREKMLTRSRKGDQTHEDQTDGTRKARNNIGPPNLFWITAKFQEQTSMPCWCLQLVNCQASSI<br>LIGLWML                                                                                                                                                                                                                                                                                                                                                                                                                                                                                                                                                                                                                                                                                                                   |
| MuHV4gp56 | 44895 | MLDEQLAWAYACLKHGRELPDIDILMSTSEKLSQQLVIKIEVIKIEKDGIFSRILKGVADAVCLKAQFLRGMITLKR<br>TPCSLPMYTLFVYVLTIPTRTRVIRDPDLLTQCKDVVLKYQPGDCITLLKAALNCHQCNCDCCKKYILDPLLGQTH<br>RTKGVFFVCE                                                                                                                                                                                                                                                                                                                                                                                                                                                                                                                                                                                                                                                                                                          |
| MuHV4gp57 | 44896 | MKSHWSDVFLPLIVGGMSAVPFIWCLIFRTLYLPIEDWRCWIFVYGSMIWHITMFMSLLFKHKHGMIGWFKLCSA<br>VAICLIIVLALLEQYCPYEMYIVPVIINIIVLLSTWVPMALISTYMCNRIYARLLELGLFAAIGYVYMLQIGAQESPAFW<br>IPIPVHLIGVYALLHFRTRPCFLHSVEKRHSIYFGNNKYTVYPCETIVRMCSPEISLMILMLAIGFPIAYYVKIV<br>QGMQYFYMFLMLGPMVGGIFDYSKVGTFEMMLALVTMIFAGIAPVWFPLMAERTFVISLILANFSAAGCFLECMRVK<br>LRRANGVYFVYLVTVLYNLLVALIMIAVSM                                                                                                                                                                                                                                                                                                                                                                                                                                                                                                                    |
| MuHV4gp58 | 44897 | MQTFQLDTERLCAAKLYQHTKSDFGNLGMIQLSGSCNNMSLSVLSIGGCCAILRLELEAARLHSSKDSKSAIY<br>SFRNASLGRFETHGGELFGPKMESASLSFYGHGVKYVEAQFVHDSSTKVTHTAAMQPIPPSCAFDDREAN<br>GIVTLSTKTAALVKWLKQHTKTCQSPVKVSISEILGVMVLSVGDASMTVDVTPVNVSSGKTRGGNKASDSGTIS<br>ADATVHVNGHCLIRSLIVCKVPGCTTPRVKFKACGILEVDGAPVKQGELTQVQLSVALLNVDSSSTRVLEKPEVVTG<br>ASKDRGASKSEDADGSPVPDHPKESLTSDDSSVPGPRSTLSSLTHTPDRFSSDLRSGCGGQQLKRPPPK<br>KDREPTTKRPKLHNFHP                                                                                                                                                                                                                                                                                                                                                                                                                                                                     |
| MuHV4gp59 | 44898 | MDFVKEFLYVSDHAGFLELTETWKNMWFPSQIPLSSDVAGIAQLNETDREFYKFLFVFLGLAERLVNFIENIEDLVK<br>EFNCHDATHYAEQMAMENIHGKYVANILQLFFNGDMMKLKEYAVKVVADPTLAKKLDWLHTRVKNTKTRAEKVL<br>IFLLIGIFFISFYSISLFRVRCMLNGICLANDYISKDELLHTRAAVLYNSLIPAKERPDAAWIKRFLQEAIVEVEYSFI<br>AAKSNVTLVVPGEIKFLQATCDRILQSIGVEPIYGHSHAPVTCPLSYNGCISVNFEREQDSTYKVTNDL                                                                                                                                                                                                                                                                                                                                                                                                                                                                                                                                                              |
| MuHV4gp60 | 44899 | MATQTMVDEPVQTVNAIDAIAELKLMAGHSEANVLGRLHFKMREVCQTQVAQFLDAFSSVLEDEGLCAFIGN<br>YSQSLDEMVRQYVSGGFAAVKENGYLAARFYDYTLRNDVKYESVPHMFMRISAFCAHYCIQNECLFKTLKHM<br>ELDRGNVVENAMDLYYFEMIASQQVCCATPVMRSAGLRDANLSSCFIFAPALDSEKTVDAVSELTLLACKS<br>GVGMDLSTYSHGKLNHALVKALDGQITYFNDHNIRPVSAAVMEIWHNTMDFLTAKLLENPERCGNLQGVCIPE<br>IFFRTYKNDPESNWYLFDPKKAELVTNTYGYMISAIYAGLVEQGYAEAVVPIKSVMFALVSCIKTGGPYLNNKAIN<br>RHDWHEWSTHQYRAINCANLCAEVIQYPGENVSTCNLANICLPKCLEDDKFVSGKSCLTYEREFISIERLERATEA<br>AVFIINACIHGGTLPTQRRRQSDRSMGIGVQGLADTFAMMGLGYFDAGSEILDQKIAETLYFNALN G<br>KGEPYANYEQSKHSIGVLHWHWDMCSPMVYTRDEWEDLARSCVEHGVNSQFVAYMPTAGTGQITGYSDSF<br>YFPYSSMSSKVSNEILRPNMMLMSRMSDSEVQTLRECNWDIAKLPELLQYRIFLSAFDYEPSLYVRRAMLRA<br>PFIDQSQSMTLFLNEDYASSASNIKLLMYGWECGLKTLMYCRIRKTATSNEFEVRRNSQQKYVNCADGEGA<br>GGEENSENCIKAEATCSLSV GASLHCQ                                                                |
| MuHV4gp61 | 44900 | MPFKLFKLLTSSVVTSATVNWATLASRTVFIPLKRVLPYLRVSVARLTVVIAMDRYGGGLGFLRVPVQKPLSL<br>TDGNKFRREGIMSEVGYVSTLVDPRNMMLDSPHHLKHNKSLQGSFLVHAGTVSDQVCGTPMFCYKDLGSLNPEI<br>DRLLTPISLTRLTPNNNSDFRIGNIYSEDSGLFDIPTLRLMERNLHEGLVFGVPLIKNIMSSYFNKITTAKGD<br>TVLNESSLHGLVLKLPVEQFMDFFETTNTFHYTGRPLMTHRSYIYALGYVITADGTQSLQKFFRTPIEGPEFTRLV<br>RDYFAGEIRNFFLGDNDFGQGNFLMFGAVCRCCGYFPEDSLLTRTRVSIKGGGLSLIEIPDFTVSRGPWQFI                                                                                                                                                                                                                                                                                                                                                                                                                                                                                     |
| MuHV4gp62 | 44901 | MPSLNLFPVSVDSGFWTGGTALRNPPSRPPYLSJAMTTLVSLATDLKYGSTLLGRIKTVLDASVAQLTVADVTEDI<br>VNLNSLNGIDHELFSFIRTYPVFVHLCLTDRTQTYTSGQVIKTIHLITTFREVLNCEMDGADNDSIANSNLKDCS<br>WYLTKLETEQMSTSIPHLPKSCITFPCEMEQVHHLVHNATLATLPNSWTSPLPSLVYVQWVFLSYKHKVFPDEV<br>PSSNIQDLADKMTNIYKHLFVPHTSQLTGASIIARSLDLSQFTPLEKIPSNSPAFAFGDELSNIPSNCHLMFGHLI<br>ESIYMGMTYACTLGAVEQFIREAFDVVLGVASEIKRTASLSDPTVTKLVNIKRIEHLSETRCEEYAQALPKWQH<br>REGIYPFEETLDHFHQKLSLTIKFCLEFYNTMLVSPTSISHSYLKENYLLQLDRKSAASQGGQPDINLEKVFITF<br>VYPOVPGQDLQRIHDAIDSIMRTLFFSWVNRNNGVILITQNPMEPSCHEQVSEERVAYACKRMPVGDLSYEP<br>MVSHKMFYKIFIRHIVGPTIQGIFSRKTSRNRALFQIRWLLSFAITDTPQLQEIRPLGMFYFELLDIINGTNKPSAMK<br>NLLDHALDLKKKINKINQTFISIPQDLILYFLVLDTGASYINSVDYITAIPKVEHLLRGRNLRGLSILCHIKYNYHPLT<br>HQFTILSSSQILEVHLETLKSLISQVEKDHQSLLMEITDLEGELRGEYSTVLSLLQDLEAYKQHELGIEFDTEPWNQ                                                             |



|           |       |                                                                                                                                                                                                                                                                                                                                                                                                                                                                                                                                                                                                                                                                                                                                                                                                                                                                                                                                                                                                                                                                                                                                                                                                                                                                                                                                                                                                                                                                                                                                                                                                                                                                                                                                                                                                                                      |
|-----------|-------|--------------------------------------------------------------------------------------------------------------------------------------------------------------------------------------------------------------------------------------------------------------------------------------------------------------------------------------------------------------------------------------------------------------------------------------------------------------------------------------------------------------------------------------------------------------------------------------------------------------------------------------------------------------------------------------------------------------------------------------------------------------------------------------------------------------------------------------------------------------------------------------------------------------------------------------------------------------------------------------------------------------------------------------------------------------------------------------------------------------------------------------------------------------------------------------------------------------------------------------------------------------------------------------------------------------------------------------------------------------------------------------------------------------------------------------------------------------------------------------------------------------------------------------------------------------------------------------------------------------------------------------------------------------------------------------------------------------------------------------------------------------------------------------------------------------------------------------|
|           |       | PRRDGGNRGDGAPERGSGPLPGPGCGSPGLGSRSPAGWGEPPGGRGPGARERAARPGVVRPRPGEKRGAA<br>QQRSVQ                                                                                                                                                                                                                                                                                                                                                                                                                                                                                                                                                                                                                                                                                                                                                                                                                                                                                                                                                                                                                                                                                                                                                                                                                                                                                                                                                                                                                                                                                                                                                                                                                                                                                                                                                     |
| MuHV4gp71 | 44910 | MGGTGGTGRSEAGCPARGAGPPAWGAGPPRRDGGNRGDGAPERGSGPLPGPGCGSPGLGSRSPAGWGE<br>PGGRGPGARERAARPGVVRPRPGEVPPGGMGGTGGTGRSEAGCPARGAGPPAWGAGPPRRDGGNRGD<br>GAPERGSGPLPGPGCGSPGLGSRSPAGWGEPPGGRGPGARERAARPGVVRPRPGEVPPGGMGGTGGTGR<br>SEAGCPARGAGPPAWGAGPPRRDGGNRGDGAPERGSGPLPGPGCGSPGLGSRSPAGWGEPPGGRGPGARE<br>RAARPGVVRPRPGEVPPGGMGGTGGTGRSEAGCPARGAGPPAWGAGPPRRDGGNRGDGAPERGSGPL<br>PGPGCGSPGLGSRSPAGWGEPPGGRGPGARERAARPGVVRPRPGEVPPGGMGGTGGTGRSEAGCPARG<br>AGPPAWGAGPPRRDGGNRGDGAPERGSGPLPGPGCGSPGLGSRSPAGWGEPPGGRGPGARERAARPGVVR<br>RPGEPVPPGGMGGTGGTGRSEAGCPARGAGPPAWGAGPPRRDGGNRGDGAPERGSGPLPGPGCGSPGLG<br>SRSPAGWGEPPGGRGPGARERAARPGVVRPRPGEVPPGGMGGTGGTGRSEAGCPARGAGPPAWGAGP<br>PRRDGGNRGDGAPERGSGPLPGPGCGSPGLGSGQSEEQHSRGPSSSEARRRMSPHRNQGLYITSVKKNTSKS<br>LNYQQV <del>I</del> HKNRKYQQVRRSGVDIP                                                                                                                                                                                                                                                                                                                                                                                                                                                                                                                                                                                                                                                                                                                                                                                                                                                                                                                                                                                                                                         |
| MuHV4gp72 | 44911 | MASQEFQGLDSSLLNEEDCRQMIYRSEREHDARMVGVNVDQHFTSQYRKVLTWTFMFCVKDLRQDNNVFP<br>L <del>V</del> ALLDELFLSTRIDRENYQSTAVALHIAKGVRAVMPKATQLAYLCCGATTADKLLTLEVKSLDLSWVADRCLST<br>DLICYILHIMHAPREDYLNINLCHPKIFCALCDGRSAMPKRPVITLACMHLTMNQKYDYENRIDGVCKSLYITKEE<br>LHQCCDLVDIAIVSFENYFKINA                                                                                                                                                                                                                                                                                                                                                                                                                                                                                                                                                                                                                                                                                                                                                                                                                                                                                                                                                                                                                                                                                                                                                                                                                                                                                                                                                                                                                                                                                                                                                        |
| MuHV4gp73 | 44912 | MSHKSGTYWATLITAFKTVSKVEELDCVDSAVLVDVSKIITLTQEFRRHYDSVYRADYGPALKNKWRD<br>S <del>L</del> SLFVDVINSGRIVGFFDVGRYVCEEVLCPSWTEDEHELLNDCMTHFFIE <del>N</del> NLMNHFL <del>E</del> EDIFLAQRKFQTTGTFLL<br>HALAKVLPRIYSGNVIYV                                                                                                                                                                                                                                                                                                                                                                                                                                                                                                                                                                                                                                                                                                                                                                                                                                                                                                                                                                                                                                                                                                                                                                                                                                                                                                                                                                                                                                                                                                                                                                                                                  |
| MuHV4gp74 | 44913 | MPTSPPTTRNTTSGKTRSGCKRRCFNKPAAMPKRRRAPKRPAPPPPGCQGDDEESSQGTQTPNPPSPVPPS<br>SPTLPPSPVPPSPVHEPPSPPPAPPSPDVDEGLDVGETDDPGPPPKRYSRYQKPHNSDPLPKYQGM<br>RRHLQVTAPRLFDPEGHPTTHFKSAVMSSTHYTLNKLHKCIQSKHVLSTPVSCLPLVPGTTQQCVTYLLSFVE<br>DKKQAKKLRVLAAYCEKYHSSVEGTIVKAKPYFPLPEPTEPPTDPEQPSTSQASGTQHGTASLDAGAEQGA<br>TGSPGSSPGQQGQSQT                                                                                                                                                                                                                                                                                                                                                                                                                                                                                                                                                                                                                                                                                                                                                                                                                                                                                                                                                                                                                                                                                                                                                                                                                                                                                                                                                                                                                                                                                                            |
| MuHV4gp75 | 44914 | MLVLRDLDELQAFLENSLSYDDYDNATWIPDLASPCT <del>V</del> SLKYGV <del>L</del> FALALFMFV <del>L</del> SVLGNLTVV <del>V</del> CVFCAYRA<br>ACKGADVLM <del>I</del> VFCFVCM <del>L</del> ASLAHVLE <del>I</del> SHLLYTMPGSMMLLCVLFYVSTLDFCIVFILMIISHRCLL <del>V</del> MTNRLFL <del>N</del><br>SKFCGACLAWFVILAIGA <del>A</del> AVETVFKPLDLSQIITHGAFICAMELGGTRVSVRLAQQLGWIWVLI <del>I</del> VCFIMV <del>V</del> C<br>RVRRMRMGKRYIYVFCITLFLICVPGKIVALDEVVRLGWVQETCEIRTVLATLGTASMILESFCALVTLITSL<br>FGSIFKKRMGESVRRVAVCRSS                                                                                                                                                                                                                                                                                                                                                                                                                                                                                                                                                                                                                                                                                                                                                                                                                                                                                                                                                                                                                                                                                                                                                                                                                                                                                                                            |
| MuHV4gp76 | 44915 | MARHFAFIYFGDSQYNETEKELIEDTEAGRAPVDT <del>S</del> GHRFIN <del>V</del> CGSLIPSNPNVNHHEHVGIYKRIQHAMSASP<br>RLPVTATPIDKSNSSRALASYGNTRWRPTTVSRELAAYLHDLIPEYSIRIESFRVICTLENTPTNISNTRLLESAY<br>GFLEDHFTANTVLSIMRPE <del>S</del> AIENYET <del>F</del> THSMLVSAPAPPDPLTMKITYPNTT <del>P</del> DSVLNHC <del>S</del> LGTYHRENLYPTM<br>LHETLSTKFPMLFGQSADVQTAHWHTC <del>S</del> MFFNPGW <del>V</del> LENIYFASWITGIDFQHSALGLYTLHPPEQQPFHLVN<br>KRSRA <del>V</del> LKKYSS <del>L</del> MRAMGLPICGGFSRPIRTHALESGQDVLINAVTGTVPQNRSLTQDPRPGDLIVLFGDFVPT<br>LHQETAPYLYTHSPELNLKILAVVKLSDTTTQCSTIKTRPFGHP <del>S</del> MLEALTE <del>L</del> HPYQAYLDLNNLQPVLSALNS <del>S</del><br>APAIHEE <del>I</del> VKHHFSLVHCPVYLLVISQDLGLEDAER <del>D</del> ATHNPLDM <del>F</del> LTAENHKLPCGVIGTLVEDRGLHFCKELF<br>DGGFFVKIEFTAQEATVPRGRLPRSRFSRHKPMKFDQSFLWTEHFNESVEAILKHPAVESKEYIVKHIDRLGQY<br>TVGQQQCGPLDLPVCD <del>S</del> ISIMMCTAL <del>K</del> TPPLDASGRPTFTLRVHSDSALDLSNSPTCWLNSKEYSKPEVFP<br>CVVTGVEQYKMQVDPVRGAVYGLVEAILNMLTSCVHGWRKMAITGSSISWSSDDPS <del>S</del> LLYQTL <del>M</del> ACKDFCY<br>SLSIPITYNATSGQTQDTGPRPGPTTNSIAFTAQCPGVMGYRKTTPDFKSHGSIYIWLPMQKLTLAGTIFQQIS<br>KLKANKLHKLAPY <del>I</del> SNLAHALEMLTSRTAILSMDHVDSDGLIAAILEMAMAGNKGCIEMPSYITRPFDMLISETPG<br>MVIEVEKSMEMV <del>K</del> AILKFKSLTY <del>Y</del> KLQVAKHGEEPVEISHAGKQLFKAHLSTVMRWWRHTYSS <del>H</del> ITQQCSN <del>L</del><br>SAKEKLYLDYGNKTDLGLMGPGRMRSHLRPVKCVDPDFGAYVCVACSPGPPHLSMALSNGGDFVPVCN<br>ILELAHTDLNEYSGIIFSGHGAENKVAASILANSLVNDQDETETLRFYKNSHT <del>F</del> LGFGEL <del>G</del> TQLLLALDIVNLQ<br>SNPQFISRTEERELFQHGALPNASALLECLWLNFYVRQSRVFLAPISGSVPAWAVGTHLGINFNHDGAEQRL<br>MTSQQISATFHGPEPGRNLEAAHYPRNPSGASNVAFCSPDGRATAMLIDPSQFFPWQWQYDAENLQCTPWQ<br>ICFFRLLWLSARD                                                                                          |
| MuHV4gp77 | 44916 | MDEDVWA <del>I</del> QVYARARTTLEEHLNRLILSRTHIFPLRSTICGVLTITRNSRTRNGRASSRRIRRWIQAARLTCS<br>LTLSTREPPDDGHGDAQRLDFIYGPFGQRPLTWCNELTELLGYILPMGTTRMDYSRRICGIYQPN <del>A</del> AILVMIEL<br>LYWFIYGRERTQLEYDHLSTFEPSSRLTSPVLSSEPDAVHANIMLAQGLGRTTYANSLTFPEAVPTMIKLTGSE<br>MATCHHTTITGPGN <del>F</del> LHANLSS <del>S</del> SNMPGVIPVAINGGSYLCNQTVGDNPLAPCITMLLKARSDHLRASGVPTGG<br>FIRPISNQLTFTEVNFVNFISKDYYVSHNRPADPCNTFI <del>V</del> AVGSFCPL <del>V</del> YRDPGPPYQVDSPLTRKLRVL<br>QEWTKDLSHACYIRSMMPQVRCISQIEILTELLSPMGALIDINDLPDPVCHGLNRNRTQEELERGIKFLNVTDDQVF<br>LLVQNETGTIQTQESVGTIEHLINLCAKYEVA <del>C</del> SIVGKCCTEPNLHISSTSNPVAVYDTADIMLTIPLDYDHGQTG<br>GLAASAPRPSREDGALNWA <del>S</del> LNLRQVWSDIITHPAVESKEYILTHIRRVANGRV <del>V</del> QQPGCGPFDFVAD <del>H</del> SLVSL<br>NSIHNTKSWTSDLTVTVSSEMVNRMSPDIWFCDPSTSDVPRLECVASAIQEYHYKVEDPILGSTYLVEALLN<br>LNTCPGATLEKTIITCSVTCSQADVHSELYDAIAECKNMCTMMGCTFMCDMAAKNPRNCINDINPLIVFSAKCI <del>V</del> DF<br>PWRGRIGPNLKEHNTLLWLPISQPTLAGSIFKTFNPHVPIHRLPQIS <del>V</del> NALF <del>K</del> LLTNTQKLFQEQDKIRSIHDVSDG<br>GLLTCVAEMAMSGGKSVVMTLP <del>D</del> HIANPKAMLLSETPGYVIEVDNDSDAILTFLQENSVAMPIGRVVPLTESST<br>FSVFH <del>K</del> SEN <del>L</del> SV <del>P</del> FFNV <del>V</del> GCWRRRHVDESTLCTHLGPRRSIAYIEYGHNFQFPVGSRYFLTSPVRSFRAPP<br>AQKRV <del>C</del> VIEFNGO <del>I</del> SEGLT <del>F</del> MLQYAG <del>F</del> LPEIVHSSCLHDFETS <del>L</del> DRFCGIVFTGSMCTLHEHGVLAAATRFTES<br>HTVVS <del>K</del> LSAF <del>C</del> RRPDTFMLGFDQLGMQILLNINLITADKTM <del>D</del> CKIDPLECMPLKKNASCTYESRWLNFIYIPESN<br>SLFFKPIQQNVFPSWIQGSNLGLPLDQHESFWRNTRQICTYYQTEQPTGIAAINYPNPVAGSPVAGICSLDGR<br>ITGCLIDPAESFFPW <del>T</del> WQFVPGN <del>R</del> ALASTP <del>W</del> QLCFQQL <del>L</del> IWTLSTDGL                                                                              |
| MuHV4gp78 | 44917 | WTLRVFHP <del>C</del> SPAEDLATQRG <del>P</del> LAWGQNPGL <del>E</del> FLP <del>R</del> VLECR <del>V</del> LPSEVDDRSR <del>I</del> SMLFSR <del>L</del> AAAFTRDLSRR<br>R <del>G</del> FPRRPEL <del>D</del> FAYSHLQSL <del>P</del> PATALQELIN <del>S</del> AVV <del>G</del> THPL <del>R</del> ANIRIDLTHLLVTL <del>L</del> HEGSTLAEVTHR <del>V</del> LSYLH <del>S</del> WN<br>RQLVTLPLGSDAETGLFPTS <del>Y</del> RRRPHPPDPVSSGIFL <del>P</del> RLGDRSSVCLGSTSPPLAYGTGYPLFLRGLTEVDHALD<br>VRHTCLHLHARIQRP <del>F</del> AVEPL <del>L</del> FLQAWLPGSRPQSTLGLFILAPSQVTP <del>L</del> SSLQSTYAVQDQAGALYACGVGP<br>THENHELGFVVHTSTTSSFD <del>R</del> NCHETW <del>N</del> ASHAGGDI <del>V</del> LVGSLEDSPLAD <del>M</del> PPHNSAQSP <del>L</del> IANGL <del>S</del> QAIAR <del>L</del> VG<br>IVK <del>S</del> IRPPYLSSELELL <del>L</del> FLPSATIDL <del>S</del> YLSQDLLDELLASTDDN <del>Y</del> EETCRQVFFNKG <del>V</del> CIPLLV <del>S</del> NTPCIDHNTG<br>DRLRQLC <del>S</del> SSGVTAVFLGRARPGAAGILVSDIRGAPPERRADFYLQDAYPRQPY <del>P</del> LGPEPSNRGRTIPHHVRF <del>P</del> W<br>BFMEFLLSHPDVESKEGIVRHLDRCGQGVVQQQCGPLDLPVSD <del>Y</del> STIY <del>G</del> VYQASAKTIQVNT <del>E</del> IAQRLILDVDA<br>V <del>P</del> IVLTNNHCICIT <del>L</del> ALGEQCRK <del>V</del> HLDPR <del>R</del> GV <del>M</del> YALLESLTNLFCSPHILVDDI <del>H</del> IAVTC <del>P</del> GNLRH <del>E</del> LYELIN <del>L</del> CL <del>R</del> CC<br>EAGVCFSTTSASDSTPE <del>R</del> SPST <del>P</del> PLMTIVFTAQATG <del>P</del> LYLAKPTPDKFSPGSPG <del>V</del> SLHPKFTLSASIAATILGLACT<br>HRLVWKT <del>L</del> KTINHFLTRGAILS <del>H</del> DISDGG <del>L</del> ITC <del>L</del> LEMAGSRRGAEIEIPAQVPCPYQF <del>M</del> LET <del>P</del> GFICEVDPLRAQDI<br>QGLCFAMIGFVSGNVPPAT <del>I</del> RCMHNRN <del>V</del> IYQESLAHATMYWRSGLREHMMKVG <del>N</del> LTPQEQQESLSLGYNRPYNL |

|                  |              |                                                                                                                                                                                                                                                                                                    |
|------------------|--------------|----------------------------------------------------------------------------------------------------------------------------------------------------------------------------------------------------------------------------------------------------------------------------------------------------|
|                  |              | <p>KLCALSMAPGSSPPKVLIVFPGQPTHGTLTAFASMGDIRPMDVTELYKTDPLTVSGCVIAGQRGTLTLLSETGGW<br/> QNLQFLDWMNTFYQQKHTFILGFGEFATQVLLALNLTWRCDRPFIAELEELINRPLRTANKVPLLQSLWLNVS<br/> FRPLHGSAACPAWACGTHLGDIDSSSSSGDTLSPGLIAARFATADGTAPATYYPRNPSGGTNVAALCSYDGRAC<br/> TMV<br/> LYLHQWQHLDQEAQESPWRLCHHLLLWALAARET</p> |
| <b>MuHV4gp79</b> | <b>44918</b> | <p>MGENMRDTPKGPPECCDAETYLVGATHESGSGPEGRVEDAQTQSIRTDHWREDEAEPEGDKTRETIVRLA<br/> SPL<br/> SPRLALSPPPPKRGGGLISSLPARGPSYPPLGRQAPATAAQSGVGGAGGWRGLEGGRPCQGVPPPLPP<br/> FPQSQSPGCPAVPRASRVALPHSSDSGPLRPPRASSGPGALPAPTPTPAPSAAPLPVLALS<br/> RVRVPVGGSSRR<br/> GGGPGGGGV</p>                               |
| <b>MuHV4gp80</b> | <b>44919</b> | <p>MRQNLGTRRGRRKSAWLSAPSPLAWLSAPHPPRRGGGGSSPASLPGGPAPTPHPWAGRHRQRPRAREWGV<br/> LGGGGGWRGEDPARESQCPLPSPLSPRARVQAAPQFPEPPGWRCRPTVQTLALSGLRGPAPAPAPSPPLPRP<br/> QPPRRLPYLFWPSAGSGCLWAGPGGAGVRGAGVSSRGPPAGGRGTVSGDPRPPGAGPGLTFTLNFE<br/> GS</p>                                                        |
| <b>MuHV4gp81</b> | <b>44920</b> | <p>MAPQARPLPPGPEDGPRRAGAGGTGARRAPLPGAGPPPPGVGGRGRGRLPGRGTPPARPPSPGPGPPQASP<br/> ASPGGSPGVGGGGARPPRGEELGPCSGMPSDRV</p>                                                                                                                                                                              |



**Supporting Information Table 2.** The 192 highest scoring H-2K<sup>b</sup>-restricted octameric epitopes from all 81 MHV68 open reading frames, as predicted by the consensus epitope prediction algorithm. The program, including documentation for its execution and sample data, is freely available at <http://jura.wi.mit.edu/bioc/grotenbreg>. Epitopes identified to give an CD8<sup>+</sup> T cells response in B6 mice are highlighted in red.

| peptide  | Orf   | Position | arb-score | smm-score | uda-score | park-score | arb-rank | smm-rank | uda-rank | park-rank | median rank |
|----------|-------|----------|-----------|-----------|-----------|------------|----------|----------|----------|-----------|-------------|
| ISMLFSRL | 44917 | 64       | -0.463    | -2.478    | -2.089    | -4.796     | 1        | 1        | 1        | 180       | 1           |
| RSYIYYAL | 44900 | 272      | -0.452    | -2.424    | -1.672    | -7.003     | 3        | 2        | 18       | 2         | 2.5         |
| AGYIYYQL | 44846 | 15       | -0.382    | -2        | -1.56     | -7.367     | 20       | 12       | 27       | 1         | 16          |
| WIFVYGSM | 44896 | 42       | -0.389    | -1.868    | -1.038    | -6.174     | 16       | 20       | 171      | 26        | 23          |
| FSPCYLSL | 44860 | 499      | -0.269    | -1.808    | -1.922    | -6.398     | 193      | 26       | 5        | 20        | 23          |
| KSLTYKYL | 44915 | 940      | -0.392    | -1.904    | -1.413    | -5.663     | 14       | 18       | 44       | 55        | 31          |
| YSFVSTL  | 44862 | 147      | -0.424    | -2.009    | -1.308    | -5.394     | 6        | 11       | 69       | 112       | 40          |
| AGLQYRGL | 44874 | 315      | -0.27     | -1.785    | -1.673    | -5.576     | 189      | 30       | 17       | 58        | 44          |
| LDFAYSHL | 44917 | 98       | -0.362    | -1.635    | -0.541    | -6.182     | 32       | 64       | 729      | 25        | 48          |
| VSLKYGVL | 44914 | 42       | -0.308    | -2.031    | -1.796    | -5.481     | 99       | 10       | 12       | 87        | 49.5        |
| IQFAYDKL | 44848 | 459      | -0.325    | -1.807    | -1.122    | -6.269     | 74       | 27       | 135      | 21        | 50.5        |
| ISNNYHKL | 44847 | 35       | -0.229    | -1.662    | -1.862    | -5.576     | 386      | 55       | 6        | 59        | 57          |
| SYLAYSFL | 44865 | 39       | -0.356    | -1.827    | -1.136    | -5.489     | 38       | 24       | 124      | 79        | 58.5        |
| FNMVFSGL | 44887 | 237      | -0.338    | -1.773    | -1.365    | -4.883     | 60       | 34       | 57       | 171       | 58.5        |
| FSIAYAGL | 44899 | 334      | -0.318    | -2.138    | -1.453    | -5.394     | 87       | 5        | 37       | 111       | 62          |
| TGFRYSYM | 44859 | 304      | -0.309    | -1.802    | -0.699    | -6.451     | 98       | 29       | 481      | 15        | 63.5        |
| FVVPFLRL | 44874 | 414      | -0.322    | -1.69     | -1.347    | -4.606     | 76       | 47       | 63       | 272       | 69.5        |
| ISLHPAKL | 44844 | 176      | -0.331    | -1.686    | -1.231    | -2.675     | 65       | 50       | 84       | 1672      | 74.5        |
| MYNLYSNL | 44864 | 154      | -0.278    | -1.896    | -1.22     | -5.576     | 168      | 19       | 91       | 64        | 77.5        |
| ATQSYAGL | 44856 | 222      | -0.321    | -1.582    | -1.225    | -6.588     | 77       | 82       | 85       | 5         | 79.5        |
| AIFVTSRL | 44877 | 304      | -0.46     | -1.632    | -1.195    | -4.061     | 2        | 66       | 100      | 454       | 83          |
| RGVMYALL | 44917 | 700      | -0.301    | -1.806    | -0.447    | -5.671     | 112      | 28       | 878      | 54        | 83          |
| SCLDYSHL | 44893 | 108      | -0.251    | -1.5      | -1.636    | -5.671     | 278      | 119      | 20       | 53        | 86          |
| IINYFLNI | 44849 | 993      | -0.32     | -2.099    | -1.217    | -5.47      | 81       | 8        | 92       | 94        | 86.5        |
| YSLLYQTL | 44915 | 750      | -0.227    | -1.723    | -1.364    | -5.299     | 403      | 41       | 59       | 117       | 88          |
| FTFVYPQV | 44901 | 465      | -0.312    | -1.559    | -1.802    | -3.871     | 92       | 86       | 10       | 524       | 89          |
| AILKFKSL | 44915 | 935      | -0.292    | -1.7      | -1.41     | -5.065     | 135      | 45       | 46       | 140       | 90.5        |
| IIGYYVML | 44896 | 140      | -0.216    | -1.513    | -1.278    | -5.576     | 456      | 110      | 75       | 72        | 92.5        |
| TSFPFLCL | 44878 | 270      | -0.252    | -1.608    | -1.524    | -5.299     | 268      | 73       | 31       | 116       | 94.5        |
| SSFYSISL | 44898 | 163      | -0.394    | -1.541    | -1.211    | -3.186     | 12       | 94       | 95       | 1037      | 94.5        |
| VTVLYNLL | 44896 | 330      | -0.221    | -1.613    | -1.437    | -5.299     | 436      | 70       | 42       | 120       | 95          |
| INHTYLQL | 44859 | 496      | -0.165    | -1.411    | -2.005    | -5.94      | 852      | 172      | 2        | 34        | 103         |
| IKYVYNFL | 44881 | 483      | -0.175    | -1.535    | -1.154    | -5.799     | 748      | 97       | 113      | 41        | 105         |
| VSQVKVHL | 44850 | 204      | -0.343    | -1.427    | -1.443    | -3.584     | 55       | 160      | 39       | 723       | 107.5       |
| IIFLVVVL | 44848 | 744      | -0.296    | -1.543    | -1.457    | -3.273     | 124      | 93       | 36       | 998       | 108.5       |
| MSNHFQNL | 44846 | 642      | -0.327    | -2.069    | -1.096    | -4.788     | 73       | 9        | 146      | 210       | 109.5       |
| MQFYMFSL | 44896 | 242      | -0.255    | -2.129    | -0.973    | -6.908     | 252      | 6        | 213      | 3         | 109.5       |
| AAQLYRGL | 44861 | 205      | -0.267    | -1.365    | -1.618    | -6.493     | 200      | 200      | 23       | 9         | 111.5       |
| MTNIYKHL | 44901 | 244      | -0.159    | -1.511    | -1.396    | -5.299     | 913      | 112      | 48       | 115       | 113.5       |
| RILDYMKL | 44886 | 81       | -0.268    | -1.998    | -0.903    | -5.94      | 196      | 13       | 273      | 33        | 114.5       |
| SCFLFKGL | 44879 | 139      | -0.296    | -1.502    | -1.12     | -5.394     | 121      | 116      | 137      | 96        | 118.5       |
| SLPVFPSL | 44870 | 180      | -0.267    | -1.355    | -1.565    | -5.8       | 199      | 208      | 25       | 40        | 119.5       |
| IILIFLLM | 44888 | 463      | -0.3      | -1.743    | -1.131    | -4.883     | 113      | 40       | 129      | 166       | 121         |
| FLFVFLGL | 44898 | 55       | -0.366    | -1.505    | -0.936    | -5.299     | 29       | 114      | 238      | 128       | 121         |
| KGFLFATL | 44879 | 61       | -0.275    | -1.748    | -0.615    | -5.576     | 177      | 39       | 595      | 68        | 122.5       |
| SSYMLSTL | 44902 | 2442     | -0.294    | -1.783    | -1.144    | -4.102     | 130      | 32       | 118      | 396       | 124         |
| ASFGFFFL | 44844 | 53       | -0.284    | -1.701    | -0.846    | -5.394     | 154      | 44       | 319      | 97        | 125.5       |
| LSDLYSHL | 44870 | 305      | -0.357    | -1.697    | -0.98     | -3.88      | 36       | 46       | 206      | 519       | 126         |
| LSPFTPRL | 44902 | 2142     | -0.345    | -1.404    | -1.254    | -4.19      | 51       | 176      | 78       | 349       | 127         |
| YYFLFLRL | 44875 | 66       | -0.294    | -1.582    | -0.921    | -5.299     | 132      | 81       | 250      | 124       | 128         |

|          |       |      |        |        |        |        |      |     |     |      |       |
|----------|-------|------|--------|--------|--------|--------|------|-----|-----|------|-------|
| LVVDFASL | 44849 | 578  | -0.274 | -1.671 | -1.172 | -4.978 | 179  | 53  | 108 | 149  | 128.5 |
| MSALFPGL | 44857 | 406  | -0.39  | -2.31  | -0.928 | -4.606 | 15   | 3   | 244 | 259  | 129.5 |
| STLIFNSL | 44881 | 491  | -0.247 | -1.649 | -1.56  | -4.701 | 296  | 59  | 26  | 220  | 139.5 |
| ISYITSLV | 44902 | 1284 | -0.278 | -1.5   | -1.39  | -2.492 | 166  | 118 | 49  | 2297 | 142   |
| IYFIFGAV | 44877 | 104  | -0.299 | -1.688 | -1.026 | -3.091 | 114  | 49  | 180 | 1175 | 147   |
| AAVLYNSL | 44898 | 198  | -0.18  | -1.366 | -1.497 | -5.394 | 700  | 199 | 35  | 98   | 148.5 |
| YSIYMELE | 44853 | 62   | -0.044 | -1.419 | -1.143 | -5.299 | 2759 | 166 | 120 | 131  | 148.5 |
| MVFLLGL  | 44845 | 357  | -0.344 | -1.638 | -0.941 | -3.178 | 54   | 63  | 235 | 1100 | 149   |
| RSYATRQL | 44902 | 968  | -0.308 | -1.484 | -1.027 | -4.882 | 101  | 128 | 179 | 176  | 152   |
| SFPTFISL | 44844 | 171  | -0.261 | -1.557 | -0.869 | -6.077 | 224  | 87  | 297 | 30   | 155.5 |
| LILLFLLL | 44857 | 336  | -0.265 | -1.521 | -1.085 | -4.883 | 208  | 106 | 150 | 165  | 157.5 |
| KYVEYGSL | 44860 | 175  | -0.162 | -1.412 | -1.085 | -5.481 | 884  | 171 | 148 | 82   | 159.5 |
| MCFDVTNL | 44847 | 535  | -0.286 | -1.528 | -1.04  | -3.455 | 149  | 103 | 170 | 808  | 159.5 |
| RSPSTPPL | 44917 | 772  | -0.348 | -1.413 | -1.067 | -4.19  | 45   | 169 | 157 | 354  | 163   |
| FYPFYSSM | 44899 | 604  | -0.273 | -1.455 | -0.962 | -6.493 | 181  | 146 | 222 | 12   | 163.5 |
| MSCYARPL | 44850 | 131  | -0.296 | -1.379 | -1.113 | -2.303 | 122  | 190 | 139 | 3457 | 164.5 |
| IFTSFPFL | 44878 | 268  | -0.353 | -1.531 | -0.785 | -4.701 | 40   | 101 | 390 | 231  | 166   |
| RIKFSL   | 44869 | 110  | -0.268 | -1.646 | -0.964 | -5.16  | 198  | 61  | 218 | 138  | 168   |
| ILFAVISL | 44860 | 706  | -0.346 | -1.283 | -1.445 | -3.186 | 50   | 289 | 38  | 1051 | 169.5 |
| SSPEYPR  | 44857 | 294  | 0.207  | -1.78  | -1.687 | -4.372 | 8354 | 33  | 16  | 307  | 170   |
| IIPKVEHL | 44901 | 670  | -0.296 | -1.343 | -1.386 | -3.956 | 123  | 218 | 50  | 497  | 170.5 |
| VVYSYGH  | 44902 | 1827 | 0.247  | -1.704 | -1.33  | -4.605 | 8957 | 42  | 64  | 278  | 171   |
| ILSQFTPL | 44901 | 272  | -0.279 | -1.1   | -1.285 | -4.796 | 164  | 582 | 72  | 186  | 175   |
| LTLAFVSL | 44884 | 47   | -0.241 | -1.483 | -1.184 | -4.701 | 326  | 130 | 102 | 228  | 179   |
| IWKSFANL | 44844 | 185  | -0.33  | -1.457 | -0.968 | -3.369 | 69   | 144 | 216 | 913  | 180   |
| IYHQIGL  | 44844 | 384  | -0.363 | -2.262 | -0.693 | -4.284 | 30   | 4   | 494 | 336  | 183   |
| VNFFNRPL | 44867 | 24   | -0.294 | -1.325 | -1.255 | -3.178 | 127  | 243 | 77  | 1084 | 185   |
| ANIKYIRM | 44861 | 311  | -0.119 | -1.252 | -1.851 | -5.853 | 1415 | 332 | 7   | 39   | 185.5 |
| SFCIYHGL | 44904 | 21   | -0.254 | -1.334 | -1.096 | -5.394 | 255  | 234 | 145 | 103  | 189.5 |
| LSKLFSTL | 44912 | 71   | -0.307 | -1.404 | -0.984 | -3.187 | 102  | 177 | 204 | 1029 | 190.5 |
| QIRVFSSL | 44849 | 530  | -0.293 | -1.455 | -0.936 | -3.274 | 133  | 147 | 237 | 946  | 192   |
| TKYNYHPL | 44901 | 694  | -0.089 | -1.282 | -1.214 | -5.704 | 1896 | 291 | 93  | 50   | 192   |
| MMYTTSKL | 44906 | 333  | -0.256 | -1.703 | -0.496 | -5.064 | 244  | 43  | 805 | 142  | 193   |
| IFLRPSPL | 44850 | 121  | -0.347 | -1.346 | -1.037 | -2.675 | 49   | 213 | 173 | 1666 | 193   |
| ASFLLSLL | 44869 | 157  | -0.318 | -1.276 | -1.222 | -3.186 | 86   | 300 | 88  | 1046 | 194   |
| LGSVYK   | 44847 | 491  | -0.338 | -1.246 | -0.435 | -5.758 | 58   | 336 | 915 | 42   | 197   |
| IGGVYALL | 44896 | 166  | -0.253 | -1.477 | -0.881 | -5.671 | 261  | 133 | 286 | 52   | 197   |
| VITLTSRL | 44864 | 8    | -0.401 | -1.518 | -0.877 | -3.273 | 9    | 107 | 290 | 994  | 198.5 |
| IIVCFIMV | 44914 | 226  | -0.311 | -1.848 | -0.858 | -2.675 | 94   | 21  | 306 | 1625 | 200   |
| ITQQCSNL | 44915 | 988  | -0.393 | -1.473 | -0.91  | -3.774 | 13   | 136 | 266 | 554  | 201   |
| IAPEFTPV | 44891 | 170  | -0.242 | -1.548 | -1.382 | -3.774 | 321  | 90  | 51  | 561  | 205.5 |
| YSVYSLT  | 44860 | 429  | 0.262  | -1.465 | -1.054 | -4.7   | 9204 | 139 | 166 | 246  | 206   |
| INFATDRL | 44851 | 45   | -0.332 | -1.438 | -0.915 | -3.966 | 64   | 155 | 260 | 492  | 207.5 |
| FTAVFPGL | 44851 | 192  | -0.287 | -1.573 | -0.644 | -4.606 | 148  | 84  | 555 | 273  | 210.5 |
| ILLPTYNL | 44872 | 302  | -0.44  | -1.45  | -0.899 | -3.273 | 5    | 148 | 277 | 960  | 212.5 |
| GSVYKLL  | 44847 | 492  | -0.201 | -1.273 | -1.202 | -5.299 | 534  | 306 | 97  | 119  | 212.5 |
| LSLAAMNL | 44902 | 812  | -0.33  | -1.659 | -0.815 | -2.58  | 68   | 57  | 358 | 2011 | 213   |
| YSTIYTG  | 44917 | 634  | -0.268 | -1.334 | -1.127 | -3.091 | 194  | 235 | 133 | 1274 | 214.5 |
| LSVFFNV  | 44916 | 934  | -0.262 | -1.657 | -0.963 | -2.58  | 220  | 58  | 219 | 2090 | 219.5 |
| SNTFFNSL | 44902 | 845  | -0.25  | -1.28  | -1.404 | -4.883 | 284  | 295 | 47  | 170  | 227   |
| VARVFYAL | 44861 | 188  | -0.38  | -1.622 | -0.79  | -2.997 | 21   | 68  | 387 | 1302 | 227.5 |
| HITMFMSL | 44896 | 52   | -0.276 | -1.31  | -0.428 | -4.788 | 174  | 262 | 935 | 195  | 228.5 |
| CHLMFGHL | 44901 | 303  | -0.269 | -1.376 | -0.515 | -4.606 | 191  | 191 | 781 | 271  | 231   |
| IVVRIIRL | 44877 | 330  | -0.356 | -1.493 | -0.823 | -2.675 | 37   | 121 | 346 | 1676 | 233.5 |
| MSQPTALL | 44885 | 232  | -0.341 | -1.493 | -0.631 | -4.19  | 56   | 120 | 573 | 356  | 238   |
| SYFYKHA  | 44893 | 184  | 0.288  | -1.554 | -0.955 | -4.7   | 9701 | 88  | 228 | 248  | 238   |
| AVGSFCPL | 44916 | 354  | -0.318 | -0.984 | -0.917 | -4.701 | 84   | 875 | 253 | 226  | 239.5 |
| AMVYTSNV | 44841 | 138  | -0.245 | -1.462 | -1.036 | -3.55  | 308  | 141 | 174 | 727  | 241   |

|           |        |      |        |        |        |        |      |      |      |      |       |
|-----------|--------|------|--------|--------|--------|--------|------|------|------|------|-------|
| RGIFYNNL  | 44869  | 386  | -0.182 | -1.821 | -0.727 | -5.758 | 677  | 25   | 452  | 44   | 248   |
| ATLCFYVL  | 44906  | 99   | -0.302 | -1.315 | -0.694 | -4.701 | 110  | 257  | 492  | 241  | 249   |
| FVPHTSQL  | 44901  | 252  | -0.294 | -0.911 | -1.007 | -4.372 | 129  | 1116 | 192  | 310  | 251   |
| FSFHVPIM  | 597855 | 24   | -0.262 | -1.287 | -1.153 | -2.996 | 217  | 286  | 115  | 1315 | 251.5 |
| FNQFYNFL  | 44847  | 553  | -0.257 | -1.201 | -0.913 | -6.58  | 240  | 399  | 263  | 6    | 251.5 |
| KLQMFPNL  | 44849  | 605  | -0.298 | -1.179 | -0.794 | -5.887 | 119  | 445  | 385  | 37   | 252   |
| SVLNHCSL  | 44915  | 214  | -0.285 | -1.222 | -1.553 | -2.398 | 150  | 367  | 28   | 2762 | 258.5 |
| AIYSFRNA  | 44897  | 74   | 0.206  | -1.753 | -0.992 | -4.371 | 8326 | 37   | 201  | 320  | 260.5 |
| AVVQFIRV  | 44891  | 253  | -0.275 | -1.233 | -1.221 | -2.493 | 176  | 352  | 90   | 2266 | 264   |
| KIFDAYPL  | 44902  | 1478 | -0.452 | -1.492 | -0.77  | -3.36  | 4    | 122  | 406  | 936  | 264   |
| VGTFMML   | 44896  | 265  | -0.241 | -1.64  | -0.418 | -4.788 | 330  | 62   | 959  | 202  | 266   |
| VNLVFPVS  | 44864  | 132  | -0.222 | -1.53  | -1.769 | -2.485 | 431  | 102  | 13   | 2417 | 266.5 |
| FILFGGEL  | 44915  | 1125 | -0.24  | -1.753 | -0.317 | -4.788 | 336  | 38   | 1193 | 208  | 272   |
| GALDYLR   | 44904  | 4    | -0.114 | -1.168 | -1.369 | -5.481 | 1498 | 462  | 54   | 91   | 276.5 |
| FVYLFHFM  | 44877  | 167  | -0.163 | -1.483 | -0.751 | -6.215 | 880  | 129  | 425  | 24   | 277   |
| DIVQFVYL  | 44893  | 272  | -0.239 | -1.344 | 0.337  | -4.788 | 342  | 215  | 4071 | 189  | 278.5 |
| SVPVTRL   | 44869  | 127  | -0.257 | -1.261 | -1.948 | -3.592 | 239  | 320  | 4    | 658  | 279.5 |
| IAPVWFPL  | 44896  | 282  | -0.249 | -1.294 | -1.314 | -3.497 | 286  | 278  | 67   | 741  | 282   |
| SVYGFTGV  | 44849  | 682  | -0.237 | -1.831 | -0.959 | -4.102 | 346  | 22   | 225  | 393  | 285.5 |
| IPFPLSTL  | 44872  | 72   | -0.26  | -1.274 | -0.906 | -3.186 | 227  | 305  | 270  | 1061 | 287.5 |
| LIPYQHA   | 44887  | 127  | 0.245  | -1.302 | -0.99  | -4.372 | 8927 | 268  | 202  | 308  | 288   |
| VAVLYAQI  | 44847  | 5    | -0.178 | -1.302 | -1.083 | -4.372 | 723  | 269  | 151  | 313  | 291   |
| LAWAYACL  | 44895  | 6    | -0.179 | -1.184 | -1.082 | -5.489 | 704  | 436  | 153  | 76   | 294.5 |
| VIPDPSSL  | 44903  | 157  | -0.252 | -1.402 | -0.845 | -3.861 | 269  | 178  | 322  | 533  | 295.5 |
| ISTVNPTL  | 44904  | 135  | -0.298 | -1.301 | -0.837 | -2.398 | 117  | 270  | 331  | 2800 | 300.5 |
| GSIVYEGL  | 44872  | 113  | -0.122 | -1.158 | -1.33  | -5.394 | 1365 | 488  | 65   | 113  | 300.5 |
| FRVLYIKL  | 44850  | 190  | -0.249 | -1.263 | -1.009 | -4.372 | 289  | 318  | 191  | 317  | 303   |
| SGFIY TSA | 44902  | 99   | 0.165  | -1.783 | -1.064 | -4.061 | 7633 | 31   | 159  | 452  | 305.5 |
| HVPSFPAL  | 44902  | 370  | -0.202 | -1.205 | -0.955 | -5.705 | 524  | 391  | 227  | 46   | 309   |
| IYLIYK KI | 44863  | 673  | -0.135 | -1.265 | -1.279 | -4.372 | 1191 | 316  | 73   | 305  | 310.5 |
| MAPQARPL  | 44920  | 1    | -0.232 | -1.318 | -1.441 | -3.402 | 373  | 252  | 40   | 906  | 312.5 |
| VVYTTDRL  | 44887  | 34   | -0.147 | -1.399 | -0.759 | -4.787 | 1054 | 180  | 414  | 214  | 314   |
| STPHAIHL  | 44857  | 425  | -0.271 | -1.174 | -1.133 | -3.592 | 185  | 454  | 126  | 654  | 319.5 |
| IVYSIYYM  | 44853  | 60   | -0.32  | -1.413 | 0.018  | -4.007 | 79   | 170  | 2371 | 472  | 321   |
| SGATFSLL  | 44888  | 57   | -0.205 | -1.504 | -0.064 | -5.16  | 510  | 115  | 2037 | 137  | 323.5 |
| AAFFVCQL  | 44885  | 95   | -0.341 | -1.099 | -1.348 | -3.273 | 57   | 586  | 62   | 985  | 324   |
| LIFRTL YL | 44896  | 26   | -0.328 | -1.315 | -0.691 | -4.148 | 72   | 258  | 499  | 391  | 324.5 |
| ALLNFLGL  | 44858  | 170  | -0.245 | -1.087 | -0.826 | -4.701 | 306  | 605  | 344  | 232  | 325   |
| KIYFYAKA  | 44849  | 149  | 0.284  | -1.567 | -0.686 | -5.064 | 9625 | 85   | 507  | 146  | 326.5 |
| LHTLFFRL  | 44846  | 458  | -0.256 | -1.199 | -0.712 | -4.701 | 249  | 405  | 468  | 240  | 327   |
| LSLDTSTL  | 44851  | 376  | -0.266 | -1.324 | -0.77  | -3.368 | 207  | 247  | 409  | 922  | 328   |
| LVFCFVCM  | 44914  | 86   | -0.166 | -1.153 | -1.059 | -5.394 | 834  | 495  | 162  | 95   | 328.5 |
| WIAAFHYL  | 44864  | 59   | -0.223 | -1.332 | 0.327  | -4.788 | 423  | 238  | 4021 | 204  | 330.5 |
| IVYKESRL  | 44880  | 533  | -0.307 | -1.511 | -0.644 | -1.981 | 104  | 113  | 553  | 3818 | 333   |
| LSPLSPRL  | 44918  | 71   | -0.278 | -1.144 | -1.205 | -3.497 | 170  | 504  | 96   | 758  | 337   |
| SQYTVHHL  | 44846  | 391  | -0.097 | -1.284 | -1.314 | -4.189 | 1778 | 288  | 68   | 386  | 337   |
| FFLLYLIL  | 44856  | 200  | -0.15  | -1.238 | -0.837 | -5.299 | 1034 | 345  | 330  | 126  | 337.5 |
| IVRVHQNL  | 44869  | 84   | -0.231 | -1.27  | -1.641 | -0.971 | 374  | 310  | 19   | 6564 | 342   |
| AVFGAVNL  | 44877  | 251  | -0.23  | -1.271 | -1.109 | -3.273 | 384  | 309  | 141  | 979  | 346.5 |
| SLVAFNAL  | 44886  | 208  | -0.244 | -1.216 | -0.239 | -4.701 | 313  | 380  | 1438 | 235  | 346.5 |
| ISTNSAKL  | 44902  | 1604 | -0.362 | -1.255 | -0.809 | -2.675 | 31   | 328  | 368  | 1651 | 348   |
| ISQAIARL  | 44917  | 405  | -0.416 | -1.66  | -0.325 | -3.592 | 7    | 56   | 1174 | 649  | 352.5 |
| YNYTYTSL  | 44848  | 663  | -0.26  | -1.159 | -0.624 | -4.787 | 225  | 481  | 582  | 217  | 353   |
| INLINQPL  | 44844  | 234  | -0.227 | -1.278 | -1.17  | -2.58  | 408  | 298  | 109  | 2143 | 353   |
| SYLMTSSL  | 44846  | 790  | -0.31  | -1.261 | -0.783 | -3.186 | 96   | 319  | 392  | 1035 | 355.5 |
| FYYVFLPV  | 44863  | 804  | -0.205 | -1.415 | -0.976 | -3.912 | 509  | 167  | 209  | 504  | 356.5 |
| AIQVYARA  | 44916  | 7    | 0.159  | -1.337 | -0.751 | -4.467 | 7504 | 226  | 423  | 291  | 357   |
| SMQLFESL  | 44880  | 19   | -0.254 | -1.132 | -0.721 | -5.895 | 257  | 525  | 457  | 35   | 357   |

|          |       |      |        |        |        |        |      |     |      |      |       |
|----------|-------|------|--------|--------|--------|--------|------|-----|------|------|-------|
| GSFEYGA  | 44887 | 303  | 0.192  | -1.429 | -0.953 | -3.966 | 8101 | 159 | 229  | 496  | 362.5 |
| MDFLTAKL | 44899 | 276  | -0.271 | -1.335 | 0.656  | -3.966 | 184  | 231 | 6505 | 495  | 363   |
| IAFNTPV  | 44860 | 251  | -0.284 | -1.153 | -0.947 | -1.481 | 155  | 496 | 231  | 4497 | 363.5 |
| VNALFKLL | 44916 | 819  | -0.108 | -1.176 | -0.895 | -4.788 | 1609 | 451 | 279  | 206  | 365   |
| RPGFSCS  | 44893 | 775  | -0.191 | -1.485 | 0.053  | -6.077 | 608  | 127 | 2528 | 29   | 367.5 |
| IINWYSAI | 44881 | 559  | -0.237 | -1.148 | -0.781 | -4.467 | 347  | 499 | 395  | 292  | 371   |
| TNYKFSLV | 44885 | 148  | -0.133 | -1.19  | -1.278 | -4.371 | 1221 | 422 | 74   | 323  | 372.5 |
| LIRFTKL  | 44860 | 310  | -0.272 | -1.588 | -0.639 | -3.733 | 183  | 78  | 562  | 571  | 372.5 |
| FVVPYAKI | 44881 | 319  | -0.174 | -1.175 | -0.98  | -4.372 | 760  | 453 | 207  | 297  | 375   |
| SSHLLQRL | 44894 | 41   | -0.233 | -1.212 | -0.84  | -2.398 | 366  | 386 | 327  | 2651 | 376   |
| SILDSVPL | 44893 | 229  | -0.246 | -1.219 | -0.785 | -2.762 | 300  | 371 | 389  | 1516 | 380   |
| STFDLQGL | 44862 | 507  | -0.263 | -1.475 | -0.645 | -3.273 | 213  | 135 | 549  | 959  | 381   |
| WQLCFQQL | 44916 | 1258 | -0.234 | -1.2   | -0.568 | -4.788 | 363  | 402 | 681  | 211  | 382.5 |
| IVFFLGGM | 44908 | 22   | -0.35  | -1.463 | -0.595 | -3.091 | 44   | 140 | 633  | 1191 | 386.5 |
| CNRIYARL | 44896 | 124  | -0.129 | -1.285 | -1.798 | -3.967 | 1260 | 287 | 11   | 487  | 387   |
| VISKFESL | 44855 | 159  | -0.225 | -1.229 | -0.73  | -5.065 | 417  | 358 | 447  | 141  | 387.5 |
| ITYFFEMI | 44899 | 164  | -0.076 | -1.214 | -0.783 | -5.201 | 2147 | 383 | 393  | 132  | 388   |
| SGHRFINI | 44915 | 36   | -0.229 | -1.288 | -0.27  | -4.138 | 389  | 285 | 1339 | 392  | 390.5 |
| FYYMTRL  | 44904 | 204  | -0.242 | -1.364 | -0.218 | -4.007 | 322  | 202 | 1495 | 475  | 398.5 |
| KLFYVFL  | 44863 | 802  | -0.181 | -1.039 | -1.145 | -5.992 | 689  | 725 | 117  | 31   | 403   |
| MRFRFQVM | 44842 | 1    | -0.213 | -1.24  | -0.318 | -4.277 | 467  | 343 | 1191 | 337  | 405   |
| LSPMAHL  | 44863 | 524  | -0.24  | -1.196 | -0.779 | -3.592 | 338  | 414 | 397  | 653  | 405.5 |
| LAIGFPI  | 44896 | 225  | 0.008  | -1.164 | -0.829 | -4.701 | 4072 | 471 | 340  | 239  | 405.5 |
| VLKKYSSL | 44915 | 314  | -0.241 | -1.118 | -1.251 | -3.967 | 328  | 552 | 79   | 488  | 408   |
| LIFLTVLL | 44865 | 46   | -0.282 | -1.151 | -0.831 | -3.966 | 159  | 497 | 336  | 494  | 415   |
| FSLTLHNL | 44891 | 202  | -0.219 | -1.616 | -0.784 | -2.667 | 442  | 69  | 391  | 1700 | 416.5 |



**Supporting Information Table 3.** The 192 highest scoring H-2D<sup>b</sup>-restricted nonameric epitopes from all 81 MHV68 open reading frames, as predicted by the consensus epitope prediction algorithm. The program, including documentation for its execution and sample data, is freely available at <http://jura.wi.mit.edu/bioc/grotenbreg>. Epitopes identified to give an CD8<sup>+</sup> T cells response in B6 mice are highlighted in red.

| peptide    | orf   | Position | arb-score | smm-score | uda-score | park-score | Arb-rank | smm-rank | uda-rank | park-rank | mid-rank |
|------------|-------|----------|-----------|-----------|-----------|------------|----------|----------|----------|-----------|----------|
| AMLGNPETL  | 44885 | 178      | -0.61     | -1.599    | -2.215    | -3.933     | 7        | 23       | 5        | 12        | 9.5      |
| FSLNLLRM   | 44869 | 114      | -0.566    | -1.966    | -1.76     | -4.012     | 18       | 7        | 30       | 2         | 12.5     |
| KALHNPKTL  | 44881 | 765      | -0.654    | -1.904    | -1.85     | -3.892     | 2        | 9        | 21       | 27        | 15       |
| CALENPGYI  | 44869 | 176      | -0.565    | -1.468    | -1.925    | -3.971     | 19       | 37       | 16       | 7         | 17.5     |
| MAVCNSFYI  | 44877 | 238      | -0.51     | -1.715    | -1.884    | -3.892     | 32       | 13       | 19       | 30        | 24.5     |
| AHLTNLLTL  | 44848 | 11       | -0.481    | -0.9      | -1.986    | -3.898     | 51       | 170      | 13       | 24        | 37.5     |
| ASPQTAPM   | 44888 | 437      | -0.541    | -1.58     | -1.607    | -2.012     | 25       | 27       | 53       | 579       | 40       |
| ALLQNLQFL  | 44917 | 1088     | -0.435    | -0.532    | -2.025    | -3.977     | 75       | 392      | 10       | 6         | 42.5     |
| LAFVNSYFM  | 44863 | 648      | -0.557    | -1.67     | -1.515    | -3.494     | 21       | 16       | 77       | 109       | 49       |
| CQLLNTIPV  | 44880 | 265      | -0.495    | -1.266    | -2.391    | -2.477     | 39       | 66       | 1        | 402       | 52.5     |
| YQCYN SATM | 44848 | 157      | -0.631    | -1.084    | -2.034    | -3.301     | 6        | 105      | 9        | 200       | 57       |
| SATVNWATL  | 44900 | 17       | -0.572    | -0.799    | -1.946    | -3.535     | 13       | 212      | 14       | 101       | 57.5     |
| DQLLNSLTL  | 44902 | 359      | -0.495    | -1.447    | -1.491    | -3.778     | 40       | 39       | 82       | 76        | 58       |
| AQLENLHQV  | 44906 | 168      | -0.481    | -1.253    | -1.812    | -2.676     | 50       | 70       | 26       | 282       | 60       |
| VALLNFLGL  | 44858 | 169      | -0.37     | -1.021    | -2.132    | -4.012     | 146      | 122      | 6        | 4         | 64       |
| FSAVNCHPL  | 44860 | 295      | -0.497    | -0.991    | -2.287    | -3.535     | 37       | 133      | 3        | 100       | 68.5     |
| FSLGTCDEI  | 44849 | 333      | -0.467    | -1.823    | -1.417    | -1.933     | 56       | 11       | 107      | 868       | 81.5     |
| KSWTNLLAL  | 44877 | 23       | -0.587    | -1.02     | -1.607    | -3.494     | 11       | 123      | 52       | 112       | 82       |
| AASQNLSSM  | 44881 | 92       | -0.514    | -1.053    | -1.529    | -3.614     | 30       | 112      | 70       | 98        | 84       |
| YMFLMLGPM  | 44896 | 246      | -0.412    | -1.969    | -1.432    | -1.494     | 90       | 6        | 103      | 2497      | 96.5     |
| FAVLTQHHL  | 44884 | 26       | -0.482    | -2.403    | -1.233    | -1.933     | 48       | 1        | 174      | 822       | 111      |
| FQYGNRVNM  | 44905 | 104      | -0.508    | -1.549    | -0.966    | -3.342     | 33       | 28       | 364      | 195       | 114      |
| CAEANFDHI  | 44875 | 463      | -0.421    | -1.108    | -1.328    | -2.795     | 81       | 101      | 129      | 253       | 115      |
| FMMLALVTM  | 44896 | 269      | -0.331    | -1.584    | -1.633    | -1.535     | 206      | 26       | 45       | 2313      | 125.5    |
| AMHMKLSPM  | 44863 | 1012     | -0.336    | -1.267    | -1.501    | -0.535     | 202      | 65       | 79       | 8101      | 140.5    |
| FGAVNLFLI  | 44877 | 253      | -0.353    | 0.105     | -1.397    | -3.614     | 173      | 1491     | 114      | 99        | 143.5    |
| EQIKNTKCI  | 44866 | 296      | -0.395    | -0.807    | 0.243     | -3.857     | 115      | 208      | 3771     | 35        | 161.5    |
| YSPENAAKL  | 44863 | 1208     | -0.292    | -0.049    | -1.85     | -3.971     | 302      | 1113     | 22       | 8         | 162      |
| HLLQNPEEI  | 44887 | 195      | -0.304    | -0.105    | -1.517    | -3.857     | 264      | 989      | 75       | 32        | 169.5    |
| HVINNTDVI  | 44860 | 560      | -0.34     | -0.549    | -1.291    | -3.778     | 195      | 374      | 145      | 94        | 170      |
| RVVSNMAL   | 44902 | 548      | -0.342    | -0.511    | -1.283    | -3.778     | 191      | 407      | 150      | 72        | 170.5    |
| FSNTNRPSL  | 44906 | 230      | -0.317    | -0.508    | -1.988    | -3.456     | 228      | 410      | 12       | 117       | 172.5    |
| VNLLTADTM  | 44880 | 413      | -0.393    | -1.413    | -1.163    | -1.819     | 118      | 45       | 231      | 1501      | 174.5    |
| KALAVLAPV  | 44858 | 122      | -0.662    | -1.185    | -1.1      | -0.67      | 1        | 85       | 271      | 6878      | 178      |
| SMVVCRTYI  | 44905 | 149      | -0.404    | -0.885    | -1.211    | -2.012     | 102      | 175      | 190      | 601       | 182.5    |
| QALSTMLAM  | 44863 | 1005     | -0.479    | -2.012    | -1.033    | -1.892     | 53       | 5        | 315      | 1096      | 184      |
| RGMLNGICL  | 44898 | 174      | -0.32     | -0.012    | -1.704    | -3.415     | 226      | 1202     | 37       | 148       | 187      |
| AALTTNLSL  | 44857 | 63       | -0.55     | -1.665    | -0.962    | -1.933     | 23       | 17       | 367      | 852       | 195      |
| AAERNHDNV  | 44864 | 163      | -0.315    | -0.941    | -1.251    | -1.456     | 235      | 154      | 161      | 2702      | 198      |
| HLLCNAVEL  | 44847 | 70       | -0.284    | 0.03      | -1.625    | -3.778     | 324      | 1295     | 46       | 73        | 198.5    |
| RVHQNL SCL | 44869 | 86       | -0.18     | -0.673    | -1.536    | -3.459     | 741      | 291      | 68       | 113       | 202      |
| SSQKNRYTI  | 44854 | 561      | -0.314    | -0.648    | -1.239    | -3.535     | 239      | 309      | 167      | 102       | 203      |
| QAIRTL PVM | 44841 | 220      | -0.401    | -1.948    | -1.05     | -1.971     | 111      | 8        | 305      | 746       | 208      |
| LAAMNLSLI  | 44902 | 814      | -0.309    | -0.609    | -1.233    | -3.494     | 247      | 335      | 173      | 111       | 210      |
| TVLTNNHCI  | 44917 | 673      | -0.407    | -0.622    | -0.954    | -3.819     | 97       | 327      | 380      | 53        | 212      |

|           |       |      |        |        |        |        |      |      |      |      |       |
|-----------|-------|------|--------|--------|--------|--------|------|------|------|------|-------|
| RQFFNKDML | 44863 | 1265 | -0.23  | -0.781 | -1.236 | -3.301 | 529  | 230  | 170  | 203  | 216.5 |
| AAILVMIEL | 44916 | 147  | -0.408 | -1.201 | -0.988 | -1.933 | 94   | 78   | 351  | 840  | 222.5 |
| SGGTNVAAL | 44917 | 1230 | -0.284 | 0.418  | -1.457 | -3.456 | 323  | 2552 | 91   | 124  | 223.5 |
| LALLTLLFV | 44877 | 29   | -0.395 | -1.788 | -1.01  | -0.67  | 117  | 12   | 336  | 6863 | 226.5 |
| KQLTNSGPT | 44848 | 813  | -0.289 | -0.952 | -1.309 | -2.477 | 310  | 148  | 136  | 397  | 229   |
| FMLQYAGFL | 44916 | 1019 | -0.642 | -0.877 | -1.074 | -1.313 | 3    | 178  | 287  | 4461 | 232.5 |
| LAINGSIV  | 44890 | 55   | -0.263 | -0.956 | -1.456 | -2.591 | 401  | 144  | 93   | 328  | 236   |
| SLVYNPPTL | 44902 | 2373 | -0.252 | -0.241 | -1.61  | -3.819 | 442  | 763  | 51   | 50   | 246.5 |
| VMPNRLFL  | 44914 | 146  | -0.235 | -0.55  | -1.585 | -3.456 | 511  | 373  | 58   | 121  | 247   |
| SAITNHAAF | 44855 | 308  | -0.279 | -0.936 | -2.13  | -1.933 | 345  | 155  | 7    | 798  | 250   |
| LSNNNPTTI | 44888 | 67   | -0.197 | -0.557 | -1.303 | -3.415 | 669  | 365  | 138  | 150  | 257.5 |
| VSLAVFLEI | 44871 | 251  | -0.318 | -0.682 | -1.159 | -2.012 | 227  | 280  | 236  | 589  | 258   |
| FAEDNKVII | 44878 | 338  | -0.088 | -0.743 | -1.141 | -2.757 | 1456 | 249  | 250  | 268  | 259   |
| FALALFMFV | 44914 | 50   | -0.632 | -0.441 | -1.661 | -0.711 | 5    | 489  | 41   | 6683 | 265   |
| KKLFNPQPI | 44875 | 157  | -0.262 | -0.143 | -1.325 | -3.778 | 407  | 922  | 131  | 89   | 269   |
| IQPDNISEI | 44849 | 1000 | -0.134 | -0.433 | -1.738 | -3.819 | 1035 | 497  | 34   | 46   | 271.5 |
| VTLPNLAAV | 44902 | 350  | -0.386 | -0.183 | -1.154 | -2.597 | 125  | 846  | 240  | 322  | 281   |
| LAVALLDEL | 44911 | 72   | -0.569 | -0.706 | -1.043 | -1.971 | 15   | 264  | 306  | 754  | 285   |
| KLLTNTQKL | 44916 | 824  | -0.32  | 0.039  | -0.992 | -3.778 | 225  | 1322 | 348  | 86   | 286.5 |
| KQLILHSFM | 44871 | 164  | -0.504 | -0.681 | -1.066 | -1.778 | 36   | 282  | 294  | 1795 | 288   |
| APVHNMHYL | 44863 | 1347 | -0.26  | -0.502 | -1.243 | -3.819 | 413  | 418  | 166  | 66   | 289.5 |
| DHIANPKAM | 44916 | 870  | -0.351 | -0.501 | -0.158 | -3.778 | 175  | 421  | 2072 | 69   | 298   |
| FALVAMGPL | 44844 | 39   | -0.145 | -1.652 | -1.996 | -2.012 | 961  | 18   | 11   | 585  | 301.5 |
| YSEKNQTPL | 44857 | 214  | -0.166 | -0.588 | -2.231 | -2.795 | 828  | 354  | 4    | 254  | 304   |
| CAVSHQDCL | 44852 | 28   | -0.422 | -0.77  | -0.957 | -1.892 | 80   | 238  | 374  | 1045 | 306   |
| DATHNPLDM | 44915 | 501  | -0.28  | -0.689 | -0.354 | -3.415 | 338  | 275  | 1428 | 144  | 306.5 |
| SLPQNGPV  | 44902 | 1819 | -0.293 | 0.218  | -1.665 | -2.597 | 300  | 1799 | 40   | 313  | 306.5 |
| KQRLNNAIL | 44846 | 817  | -0.568 | -0.585 | -0.394 | -2.778 | 16   | 356  | 1332 | 262  | 309   |
| SMLEALTEL | 44915 | 431  | -0.023 | -1.006 | -1.61  | -2.091 | 2176 | 130  | 50   | 491  | 310.5 |
| KALESLILL | 44857 | 331  | -0.406 | -0.151 | -1.557 | -2.05  | 100  | 911  | 66   | 523  | 311.5 |
| KALASGKYL | 44906 | 394  | -0.558 | -0.459 | -1.269 | -1.892 | 20   | 472  | 155  | 1091 | 313.5 |
| FAIESLQRM | 44863 | 375  | -0.589 | -0.859 | -0.88  | -2.091 | 10   | 182  | 447  | 490  | 314.5 |
| SMFFNPGWV | 44915 | 261  | -0.327 | -0.498 | -1.277 | -2.155 | 218  | 428  | 153  | 451  | 323   |
| NAIQVWLTL | 44877 | 125  | -0.457 | -1.27  | -0.679 | -2.012 | 63   | 64   | 724  | 583  | 323.5 |
| AGPHNDMEI | 44846 | 487  | -0.215 | 0.085  | -1.558 | -3.933 | 585  | 1434 | 65   | 13   | 325   |
| AMTVFAHAM | 44902 | 1632 | -0.58  | -0.569 | -1.023 | -1.535 | 12   | 362  | 325  | 2321 | 343.5 |
| TLLKNVTTL | 44902 | 637  | -0.162 | -0.335 | -1.467 | -3.898 | 855  | 615  | 86   | 22   | 350.5 |
| SAIENYETF | 44915 | 176  | -0.109 | -1.037 | -1.623 | -2.012 | 1240 | 118  | 47   | 598  | 358   |
| KVYANILQL | 44898 | 99   | -0.288 | -0.503 | -0.655 | -3.301 | 314  | 417  | 760  | 232  | 365.5 |
| VSSANSLSI | 44904 | 348  | -0.21  | 0.055  | -1.377 | -3.456 | 607  | 1364 | 118  | 125  | 366   |
| IQNYVQWPM | 44846 | 289  | -0.481 | -1.049 | -0.757 | -1.342 | 52   | 115  | 618  | 3915 | 366.5 |
| LMIVMGTWL | 44852 | 92   | -0.397 | -2.109 | -0.753 | -1.971 | 113  | 2    | 623  | 732  | 368   |
| QVPENKTTI | 44880 | 146  | -0.133 | -0.314 | -1.491 | -3.857 | 1047 | 659  | 83   | 38   | 371   |
| FLHANLSSI | 44916 | 246  | -0.208 | -0.181 | -1.728 | -3.421 | 609  | 848  | 36   | 139  | 374   |
| SAVVGTHPL | 44917 | 120  | -0.023 | -0.923 | -1.945 | -2.012 | 2179 | 161  | 15   | 596  | 378.5 |
| ASLAHVLEI | 44914 | 95   | -0.275 | -0.509 | -1.409 | -1.933 | 355  | 409  | 110  | 819  | 382   |
| ILIRNARPL | 44851 | 35   | -0.188 | -0.255 | -1.826 | -3.819 | 705  | 747  | 24   | 59   | 382   |
| SVLGNLTVV | 44914 | 60   | -0.224 | -0.481 | -1.583 | -2.597 | 551  | 450  | 60   | 320  | 385   |
| HMLIESIEM | 44905 | 179  | -0.516 | -0.301 | -1.45  | -1.971 | 29   | 680  | 95   | 724  | 387.5 |
| NQLESLATL | 44875 | 26   | -0.493 | -0.048 | -1.428 | -1.977 | 43   | 1114 | 104  | 684  | 394   |
| VQPQALSTM | 44863 | 1002 | -0.078 | -1.289 | -1.454 | -1.977 | 1548 | 61   | 94   | 699  | 396.5 |
| IAMTTLVSL | 44901 | 34   | -0.282 | -0.848 | -0.862 | -1.535 | 329  | 186  | 470  | 2384 | 399.5 |

|           |       |      |        |        |        |        |      |      |      |       |       |
|-----------|-------|------|--------|--------|--------|--------|------|------|------|-------|-------|
| TVHVNHGCL | 44897 | 230  | -0.191 | -0.378 | -1.162 | -3.421 | 698  | 567  | 234  | 142   | 400.5 |
| LQIEKLFTL | 44902 | 447  | -0.372 | -0.583 | -0.879 | -0.936 | 142  | 357  | 448  | 5647  | 402.5 |
| FAHHLQYV  | 44872 | 203  | -0.456 | -0.433 | -1.037 | -0.155 | 64   | 498  | 309  | 10236 | 403.5 |
| NSLTNSQFA | 44902 | 1623 | 0.043  | -0.424 | -1.574 | -2.632 | 3061 | 510  | 61   | 302   | 406   |
| ASKLNYHTV | 44862 | 618  | -0.298 | -0.4   | -1.199 | -1.632 | 280  | 536  | 195  | 2233  | 408   |
| VTLANQTKI | 44861 | 16   | -0.255 | -0.366 | -0.938 | -3.819 | 425  | 582  | 393  | 58    | 409   |
| SSISMCLPL | 44893 | 61   | -0.193 | -1.586 | -1.289 | -1.933 | 688  | 25   | 146  | 872   | 417   |
| TLPVMCFPM | 44841 | 224  | -0.247 | -0.681 | -0.955 | -1.898 | 464  | 281  | 379  | 891   | 421.5 |
| SSVTSATV  | 44900 | 12   | -0.482 | -1.367 | -0.633 | -0.711 | 49   | 49   | 801  | 6693  | 425   |
| ASVVSQPI  | 44904 | 152  | -0.315 | -0.149 | -1.11  | -2.012 | 236  | 916  | 264  | 587   | 425.5 |
| IVGVNGDNM | 44845 | 14   | -0.262 | -0.414 | -0.863 | -3.421 | 402  | 523  | 468  | 128   | 435   |
| RCMHNRNVI | 44917 | 947  | -0.2   | 0.125  | -1.218 | -3.301 | 652  | 1546 | 185  | 220   | 436   |
| CSIGNCGKL | 44875 | 419  | -0.281 | -0.395 | -0.418 | -3.892 | 334  | 545  | 1271 | 29    | 439.5 |
| SVLLNYQQV | 44910 | 700  | -0.178 | -0.43  | -1.165 | -2.518 | 751  | 501  | 229  | 378   | 439.5 |
| VSAVGLFGL | 44845 | 373  | -0.299 | -0.838 | -0.37  | -2.012 | 277  | 193  | 1390 | 609   | 443   |
| FANNTVFCM | 44861 | 286  | -0.457 | -1.47  | -0.619 | -1.456 | 62   | 36   | 830  | 2746  | 446   |
| HGVYNSQFV | 44899 | 578  | -0.392 | -0.243 | -0.775 | -2.591 | 119  | 760  | 579  | 324   | 451.5 |
| KIYNFLNI  | 44849 | 992  | -0.3   | -0.325 | -0.281 | -3.857 | 276  | 627  | 1673 | 41    | 451.5 |
| DSVLNHCSL | 44915 | 213  | -0.034 | -0.543 | -0.809 | -3.892 | 2030 | 380  | 529  | 28    | 454.5 |
| FSIANTYLT | 44883 | 230  | -0.053 | -0.369 | -1.014 | -2.632 | 1831 | 579  | 331  | 303   | 455   |
| AGIVSSQPL | 44892 | 158  | -0.282 | 0.594  | -1.586 | -2.012 | 330  | 3409 | 57   | 581   | 455.5 |
| TSLEGLTFM | 44916 | 1012 | -0.066 | -0.754 | -1.021 | -2.012 | 1671 | 244  | 329  | 582   | 455.5 |
| AAVKQSAYL | 44855 | 226  | -0.545 | 0.128  | -1.032 | -2.012 | 24   | 1557 | 316  | 595   | 455.5 |
| FFLSNYLLI | 44908 | 14   | -0.142 | -0.42  | -0.93  | -3.819 | 982  | 515  | 400  | 47    | 457.5 |
| AAVCKMRPI | 44846 | 889  | -0.278 | -1.098 | -0.785 | -0.933 | 348  | 103  | 567  | 5672  | 457.5 |
| AMHANRATD | 44902 | 480  | -0.248 | -0.992 | 1.199  | -2.155 | 463  | 132  | 9677 | 460   | 461.5 |
| LQKINIRTL | 44902 | 786  | -0.199 | -0.166 | -1.085 | -2.778 | 653  | 886  | 280  | 266   | 466.5 |
| WQLCFQQLL | 44916 | 1258 | -0.377 | -0.245 | -1.223 | -1.778 | 135  | 757  | 182  | 1809  | 469.5 |
| HAIVGATPL | 44893 | 582  | -0.106 | -0.817 | -1.519 | -1.971 | 1268 | 202  | 72   | 744   | 473   |
| PKLPNQHPM | 44842 | 167  | -0.258 | -0.393 | -0.808 | -2.778 | 417  | 546  | 530  | 257   | 473.5 |
| YSVGMGAEI | 44853 | 4    | -0.362 | -1.291 | -0.633 | -1.892 | 157  | 60   | 798  | 1094  | 477.5 |
| FMIDNNFST | 44849 | 237  | -0.147 | -0.391 | -0.919 | -2.632 | 939  | 549  | 410  | 299   | 479.5 |
| FSLVMMMAV | 44877 | 232  | -0.288 | -0.524 | -0.787 | -0.632 | 313  | 396  | 564  | 7204  | 480   |
| LSLFFFAAI | 44905 | 209  | -0.336 | -0.059 | -1.16  | -1.971 | 203  | 1090 | 235  | 728   | 481.5 |
| YAVYWHEQM | 44878 | 369  | -0.203 | -0.962 | -1.003 | -1.193 | 637  | 143  | 344  | 5303  | 490.5 |
| KAPAFHPEL | 44903 | 7    | -0.346 | -0.213 | -1.583 | -1.892 | 184  | 798  | 59   | 1129  | 491   |
| VAVGSFCPL | 44916 | 353  | -0.271 | -0.163 | -1.799 | -2.012 | 370  | 891  | 29   | 612   | 491   |
| MQLATLCLL | 44841 | 1    | -0.239 | -1.053 | -0.844 | -1.857 | 494  | 113  | 493  | 1252  | 493.5 |
| FATQVLLAL | 44917 | 1116 | -0.504 | -0.923 | -0.622 | -1.614 | 35   | 162  | 826  | 2241  | 494   |
| YVYVNGQSV | 44880 | 30   | -0.239 | 0.122  | -1.004 | -2.079 | 493  | 1535 | 343  | 503   | 498   |
| LMLVSPSI  | 44901 | 421  | -0.309 | -0.086 | -1.463 | -1.971 | 249  | 1034 | 89   | 747   | 498   |
| HAVEPLLFL | 44917 | 271  | -0.14  | -0.454 | -0.855 | -2.05  | 999  | 474  | 477  | 524   | 500.5 |
| KGLTTFKYI | 44902 | 892  | -0.304 | -0.862 | -0.231 | -1.971 | 267  | 181  | 1822 | 738   | 502.5 |
| SAPMKVTVI | 44846 | 164  | -0.262 | -0.347 | -1.415 | -0.933 | 406  | 601  | 108  | 5668  | 503.5 |
| KAKRKRYPM | 44902 | 269  | -0.35  | -0.637 | -0.702 | 0.108  | 177  | 315  | 692  | 14404 | 503.5 |
| GQLATCEVI | 44863 | 1170 | -0.28  | -1.285 | -0.715 | -1.778 | 339  | 62   | 675  | 1928  | 507   |
| TCLNNTSL  | 44906 | 316  | -0.328 | 0.011  | -0.628 | -3.898 | 214  | 1252 | 808  | 16    | 511   |
| FAYSHLQSL | 44917 | 100  | -0.253 | -0.44  | -0.799 | -1.535 | 434  | 490  | 545  | 2379  | 517.5 |
| SAVPIWCL  | 44896 | 18   | -0.277 | -0.49  | -0.763 | -1.933 | 349  | 440  | 597  | 826   | 518.5 |
| IAPVWFPLM | 44896 | 282  | -0.26  | -0.325 | -1.231 | -1.392 | 412  | 625  | 176  | 3385  | 518.5 |
| YVAPNSDWV | 44902 | 1084 | -0.307 | 0.087  | -0.938 | -2     | 251  | 1439 | 394  | 660   | 527   |
| YMLSTEHQM | 44870 | 168  | -0.194 | -1.625 | -0.957 | -1.892 | 682  | 21   | 376  | 1130  | 529   |

|            |       |      |        |        |        |        |      |      |      |       |       |
|------------|-------|------|--------|--------|--------|--------|------|------|------|-------|-------|
| SVLVNGIAA  | 44863 | 914  | -0.028 | -0.257 | -1.885 | -2.597 | 2101 | 743  | 18   | 317   | 530   |
| SSVTGKFEM  | 44848 | 133  | -0.003 | -0.882 | -1.15  | -1.933 | 2414 | 176  | 241  | 825   | 533   |
| NNLMNHFPPL | 44912 | 126  | -0.055 | -0.092 | -2.323 | -3.819 | 1809 | 1018 | 2    | 49    | 533.5 |
| HSLVSLNSI  | 44916 | 611  | -0.225 | 0.631  | -0.896 | -2.05  | 550  | 3613 | 428  | 525   | 537.5 |
| DSMANQDTA  | 44887 | 436  | -0.184 | -0.348 | -1.225 | -2.114 | 722  | 599  | 180  | 479   | 539   |
| SGLTSSFAL  | 44844 | 33   | -0.33  | 0.676  | -1.61  | -1.933 | 208  | 3849 | 49   | 873   | 540.5 |
| LSPMGFIHM  | 44863 | 1017 | 0.214  | -0.533 | -1.106 | -1.971 | 6474 | 391  | 268  | 705   | 548   |
| SAPAIHEEI  | 44915 | 463  | -0.3   | 0.768  | -1.347 | -1.933 | 275  | 4397 | 122  | 823   | 549   |
| IQEQNIPSL  | 44881 | 517  | -0.138 | -0.206 | -1.07  | -2.722 | 1010 | 811  | 291  | 270   | 551   |
| HSIMMCTAL  | 44915 | 634  | -0.419 | -1.698 | -0.504 | -1.892 | 85   | 14   | 1041 | 1032  | 558.5 |
| WVNRNWGIV  | 44901 | 496  | -0.235 | 0.204  | -0.842 | -2     | 506  | 1755 | 495  | 613   | 559.5 |
| RKLINLGRM  | 44878 | 89   | -0.225 | -0.368 | -0.484 | -3.857 | 547  | 580  | 1092 | 44    | 563.5 |
| ESLKNFNWL  | 44902 | 1304 | -0.17  | -0.615 | -0.471 | -4.05  | 802  | 330  | 1119 | 1     | 566   |
| QGLENQEIV  | 44862 | 512  | -0.162 | 0.069  | -1.215 | -2.67  | 852  | 1393 | 188  | 284   | 568   |
| FTFDNALKM  | 44863 | 444  | -0.24  | -0.317 | -0.223 | -3.342 | 489  | 654  | 1853 | 185   | 571.5 |
| SLPKNSLDI  | 44893 | 709  | -0.125 | 0.455  | -1.617 | -3.898 | 1103 | 2728 | 48   | 21    | 575.5 |
| KILTNRDL   | 44902 | 1015 | -0.283 | -0.191 | -0.324 | -3.857 | 326  | 830  | 1536 | 40    | 578   |
| NSLVSSAI   | 44849 | 158  | -0.277 | 0.235  | -0.777 | -2.012 | 350  | 1852 | 577  | 580   | 578.5 |
| FSISCKFPI  | 44904 | 124  | -0.188 | -0.465 | -1.462 | -1.933 | 706  | 463  | 90   | 880   | 584.5 |
| YSFRNASSL  | 44897 | 76   | -0.137 | -0.085 | -2.113 | -3.415 | 1021 | 1038 | 8    | 149   | 585   |
| FQNITPISV  | 44891 | 36   | -0.288 | -0.695 | -0.604 | -0.041 | 312  | 269  | 861  | 12480 | 586.5 |
| ANFQNSMSL  | 44857 | 168  | -0.135 | 0.685  | -1.414 | -3.421 | 1033 | 3883 | 109  | 141   | 587   |
| SGLKNISSI  | 44893 | 55   | -0.078 | -0.033 | -1.757 | -4.012 | 1550 | 1148 | 31   | 5     | 589.5 |
| IAVGKTAL   | 44859 | 335  | -0.327 | -0.655 | -0.59  | -0.933 | 219  | 300  | 883  | 5696  | 591.5 |
| SAGCFLECM  | 44896 | 305  | -0.303 | -0.303 | -0.825 | -1.535 | 268  | 673  | 512  | 2350  | 592.5 |
| AAVTCGPNL  | 44917 | 728  | -0.358 | -0.606 | -0.395 | -1.933 | 160  | 337  | 1329 | 850   | 593.5 |
| VALTKLPVV  | 44862 | 196  | -0.186 | -0.452 | -1.31  | 0.289  | 712  | 477  | 135  | 15939 | 594.5 |
| SYVKNSFVL  | 44893 | 663  | -0.173 | -0.298 | -0.825 | -3.898 | 770  | 684  | 511  | 18    | 597.5 |
| AAYCKRMPV  | 44901 | 526  | -0.204 | -0.38  | -0.795 | 0.845  | 631  | 564  | 549  | 24722 | 597.5 |
| FLPEHLLAI  | 44869 | 23   | -0.237 | 0.53   | -1.364 | -1.977 | 499  | 3074 | 119  | 698   | 598.5 |
| KNLSNCTDI  | 44885 | 40   | -0.149 | 0.037  | -1.096 | -3.778 | 932  | 1319 | 276  | 93    | 604   |
| SNLAHALEM  | 44915 | 858  | -0.336 | -0.097 | -1.464 | -1.819 | 204  | 1004 | 87   | 1767  | 604   |
| KMVSHTPSL  | 44902 | 2044 | -0.258 | -0.293 | -0.821 | -1.892 | 415  | 690  | 519  | 1099  | 604.5 |
| TMLAMHMKL  | 44863 | 1009 | -0.267 | -1.359 | -0.466 | -1.933 | 392  | 50   | 1136 | 820   | 606   |
| SGVQLPQPL  | 44887 | 48   | -0.21  | 0.531  | -0.908 | -2.012 | 604  | 3078 | 420  | 611   | 607.5 |
| QNLQFLDWM  | 44917 | 1091 | -0.279 | -0.094 | -0.891 | -1.936 | 343  | 1012 | 432  | 787   | 609.5 |
| FQHPWQEI   | 44866 | 199  | -0.242 | -0.449 | -0.67  | -0.643 | 483  | 481  | 737  | 7100  | 610   |
| MMLAIGFPI  | 44896 | 223  | -0.472 | 0.38   | -1.418 | -1.892 | 54   | 2389 | 106  | 1124  | 615   |
| CAPGMPGEI  | 44874 | 228  | -0.342 | -1.307 | -0.418 | -1.892 | 190  | 57   | 1272 | 1042  | 616   |
| NVVENAMD   | 44899 | 155  | -0.168 | -0.014 | -0.906 | -3.898 | 811  | 1198 | 421  | 15    | 616   |
| LSLLTLFRM  | 44904 | 73   | -0.244 | -1.5   | -0.178 | -1.971 | 476  | 32   | 2023 | 756   | 616   |
| AKLLNHFLI  | 44847 | 441  | -0.118 | 0.212  | -1.494 | -3.819 | 1153 | 1780 | 81   | 56    | 617   |
| AAMEACLPL  | 44852 | 76   | -0.139 | -0.751 | -1.739 | -1.535 | 1004 | 246  | 33   | 2344  | 625   |
